# Supplementary material for: National Burden and Trends for 29 Groups of Cancer in Mexico from 1990 to 2019: A Secondary Analysis of the Global Burden of Disease Study 2019
Source: Preprints.org preprint supplement (doi:10.20944/preprints202311.1541.v1), 2023-11-23
Supplement: Supplementary file 3 [file supplementary]

Supplementary Information

[**Supplementary Figure 1.** National rank for 1990 and 2019 and global rank for 2019 of the number of new incident cases of the 21 groups of injuries and disease of the cause 2 level hierarchy of the GBD. 2](#_Toc151497773)

[**Supplementary Figure 2.** National rank for 1990 and 2019 and global rank for 2019 of the number of deaths due to the 21 groups of injuries and disease of the cause 2 level hierarchy of the GBD. 3](#_Toc151497774)

[**Supplementary Figure 3.** National rank for 1990 and 2019 and global rank for 2019 of the DALYs counts due to the 21 groups of injuries and disease of the cause 2 level hierarchy of the GBD. 4](#_Toc151497775)

[**Supplementary Figure 4.** (a) National ranking and (b) percentage of annual change from 1990 to 2019 of the DALYs counts due to each of the 29 groups of malign neoplasms mapped by the GBD. 5](#_Toc151497776)

[**Supplementary Figure 5.** Cancer-specific trends and annual percentage of change from 1990 to 2019 of the age-standardized rate of incidence (per 100,000 people) in Mexico. 6](#_Toc151497777)

[**Supplementary Figure 6.** Cancer-specific trends and annual percentage of change from 1990 to 2019 of the age-standardized rate of DALYs (per 100,000 people) in Mexico. 7](#_Toc151497778)

[**Supplementary Figure 7.** Sex and age-specific distribution of DALYs (a) due to malignant neoplasms in Mexico during 2019, cancer-specific DALYs counts (b) and age-standardized rate of death per 100,000 people (c) by sex. 8](#_Toc151497779)

[**Supplementary Figure 8.** Cancer-specific incident cases and age-standardized rate of death (per 100,000 people) by sex (b) in Mexico during 2019. 9](#_Toc151497780)

[**Supplementary Figure 9.** Age-specific rate of incidence (per 100,000 people) by sex for each group of cancer in Mexico during 2019. 10](#_Toc151497781)

[**Supplementary Figure 10.** Age-specific rate of DALYs (per 100,000 people) by sex for each group of cancer in Mexico during 2019. 11](#_Toc151497782)

[**Supplementary Table 1.** Total and sex-specific age-standardized rate of incidence, mortality, and DALYs (per 100,000 people) by group of cancer in Mexico during 2019. 12](#_Toc151497783)

[**Supplementary Table 2.** Total and sex-specific DALYs counts by group of cancer in Mexico during 2019. 14](#_Toc151497784)

[**Supplementary Table 3.** Percentage of change from 1990 to 2019 of the crude incidence, deaths, and DALYs due to 29 malignant neoplasms in Mexico. 15](#_Toc151497785)

[**Supplementary Table 4.** Percentage of change from 1990 to 2019 of the age-standardized rate of incidence, deaths, and DALYs (per 100,000 people) due to 29 malignant neoplasms in Mexico. 16](#_Toc151497786)


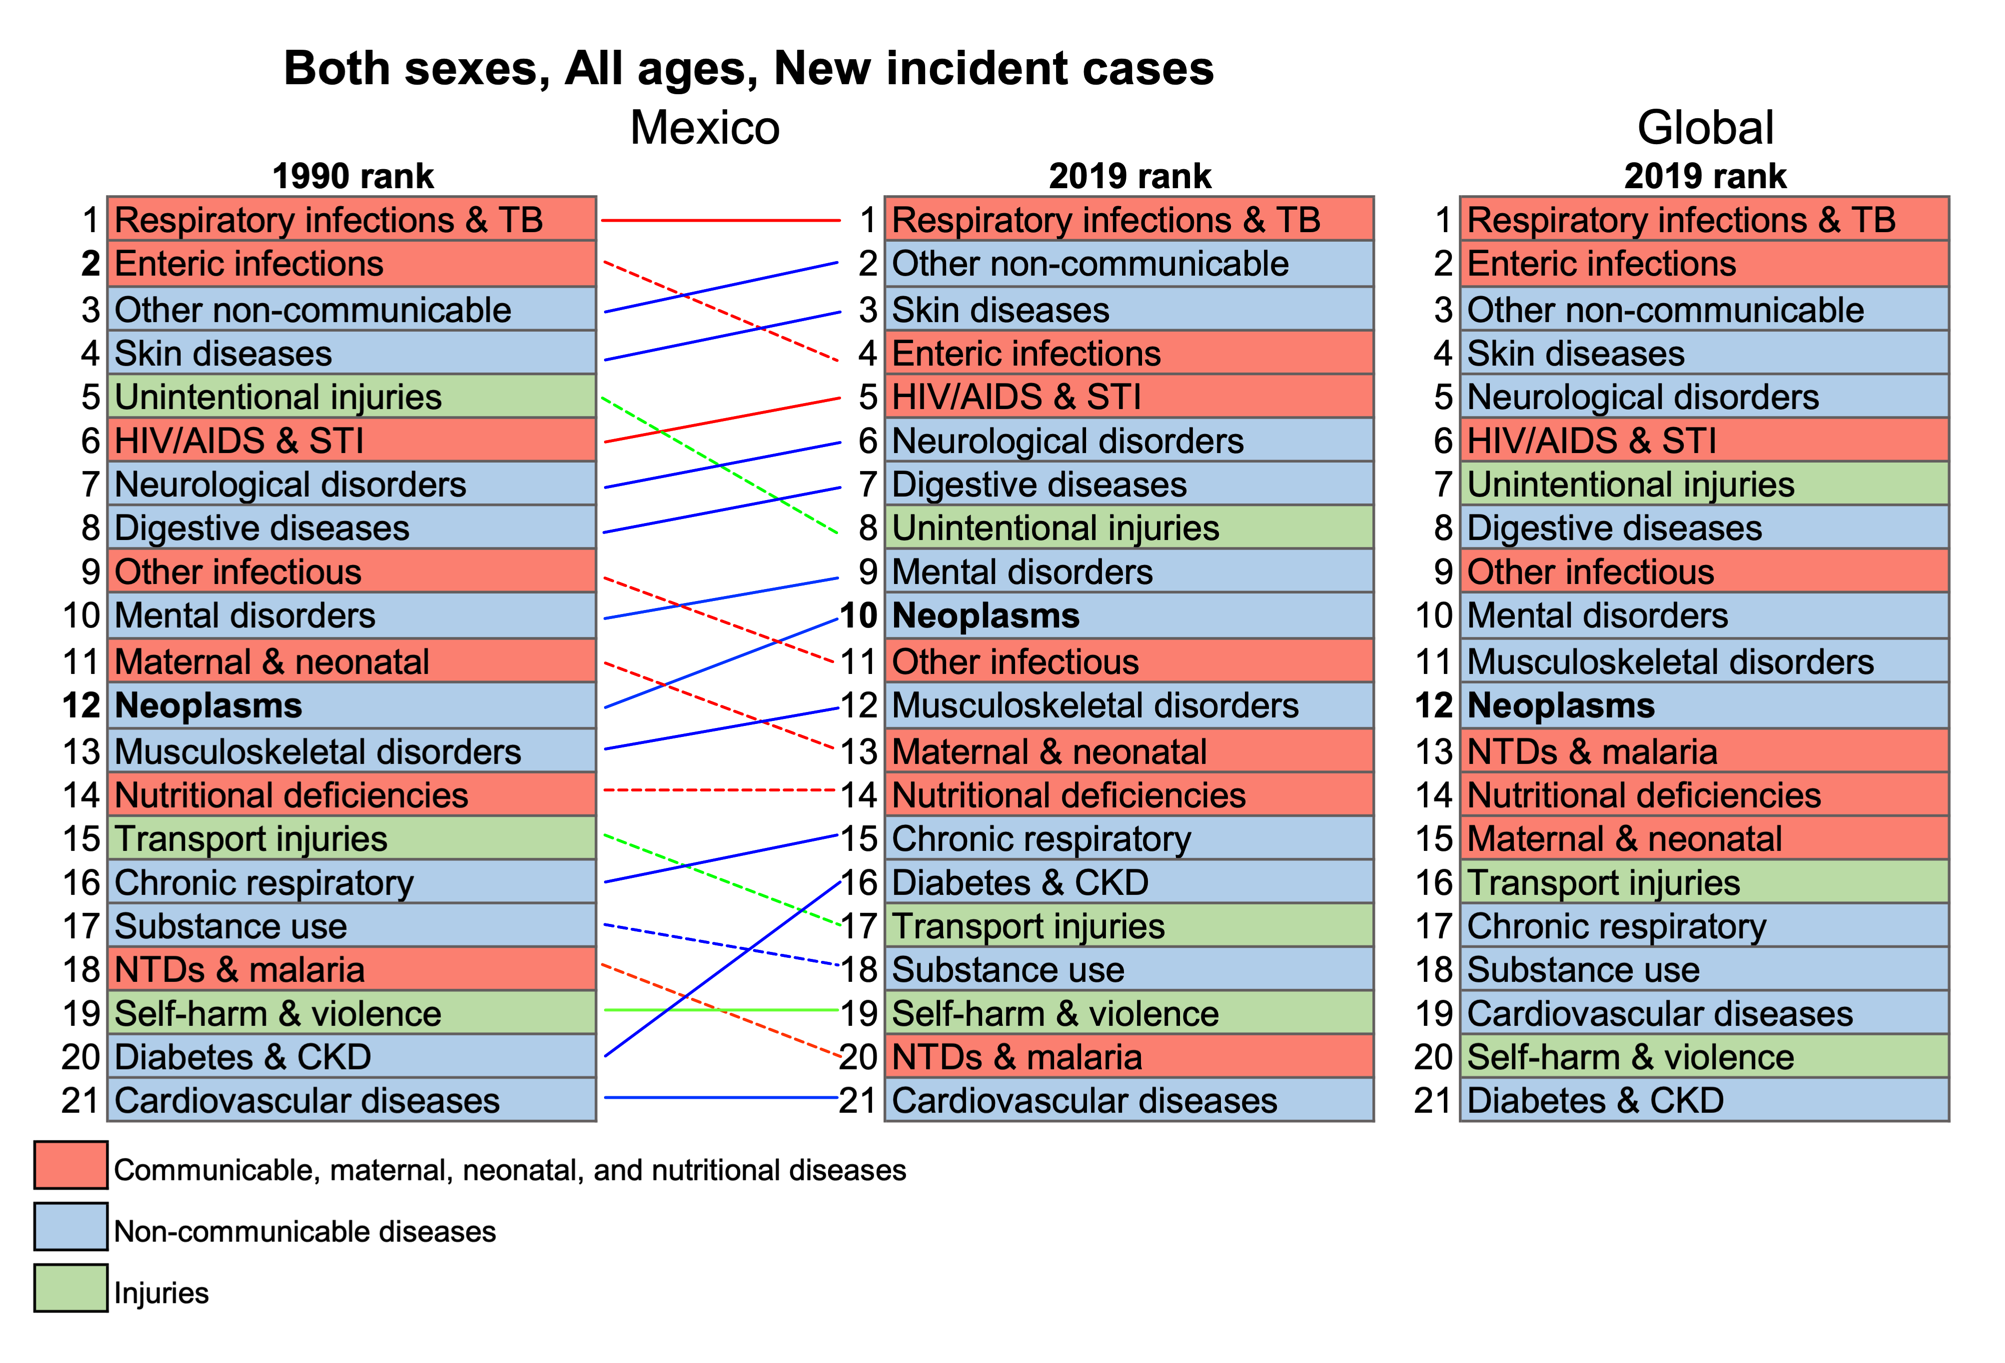


# **Supplementary Figure 1.** National rank for 1990 and 2019 and global rank for 2019 of the number of new incident cases of the 21 groups of injuries and disease of the cause 2 level hierarchy of the GBD.


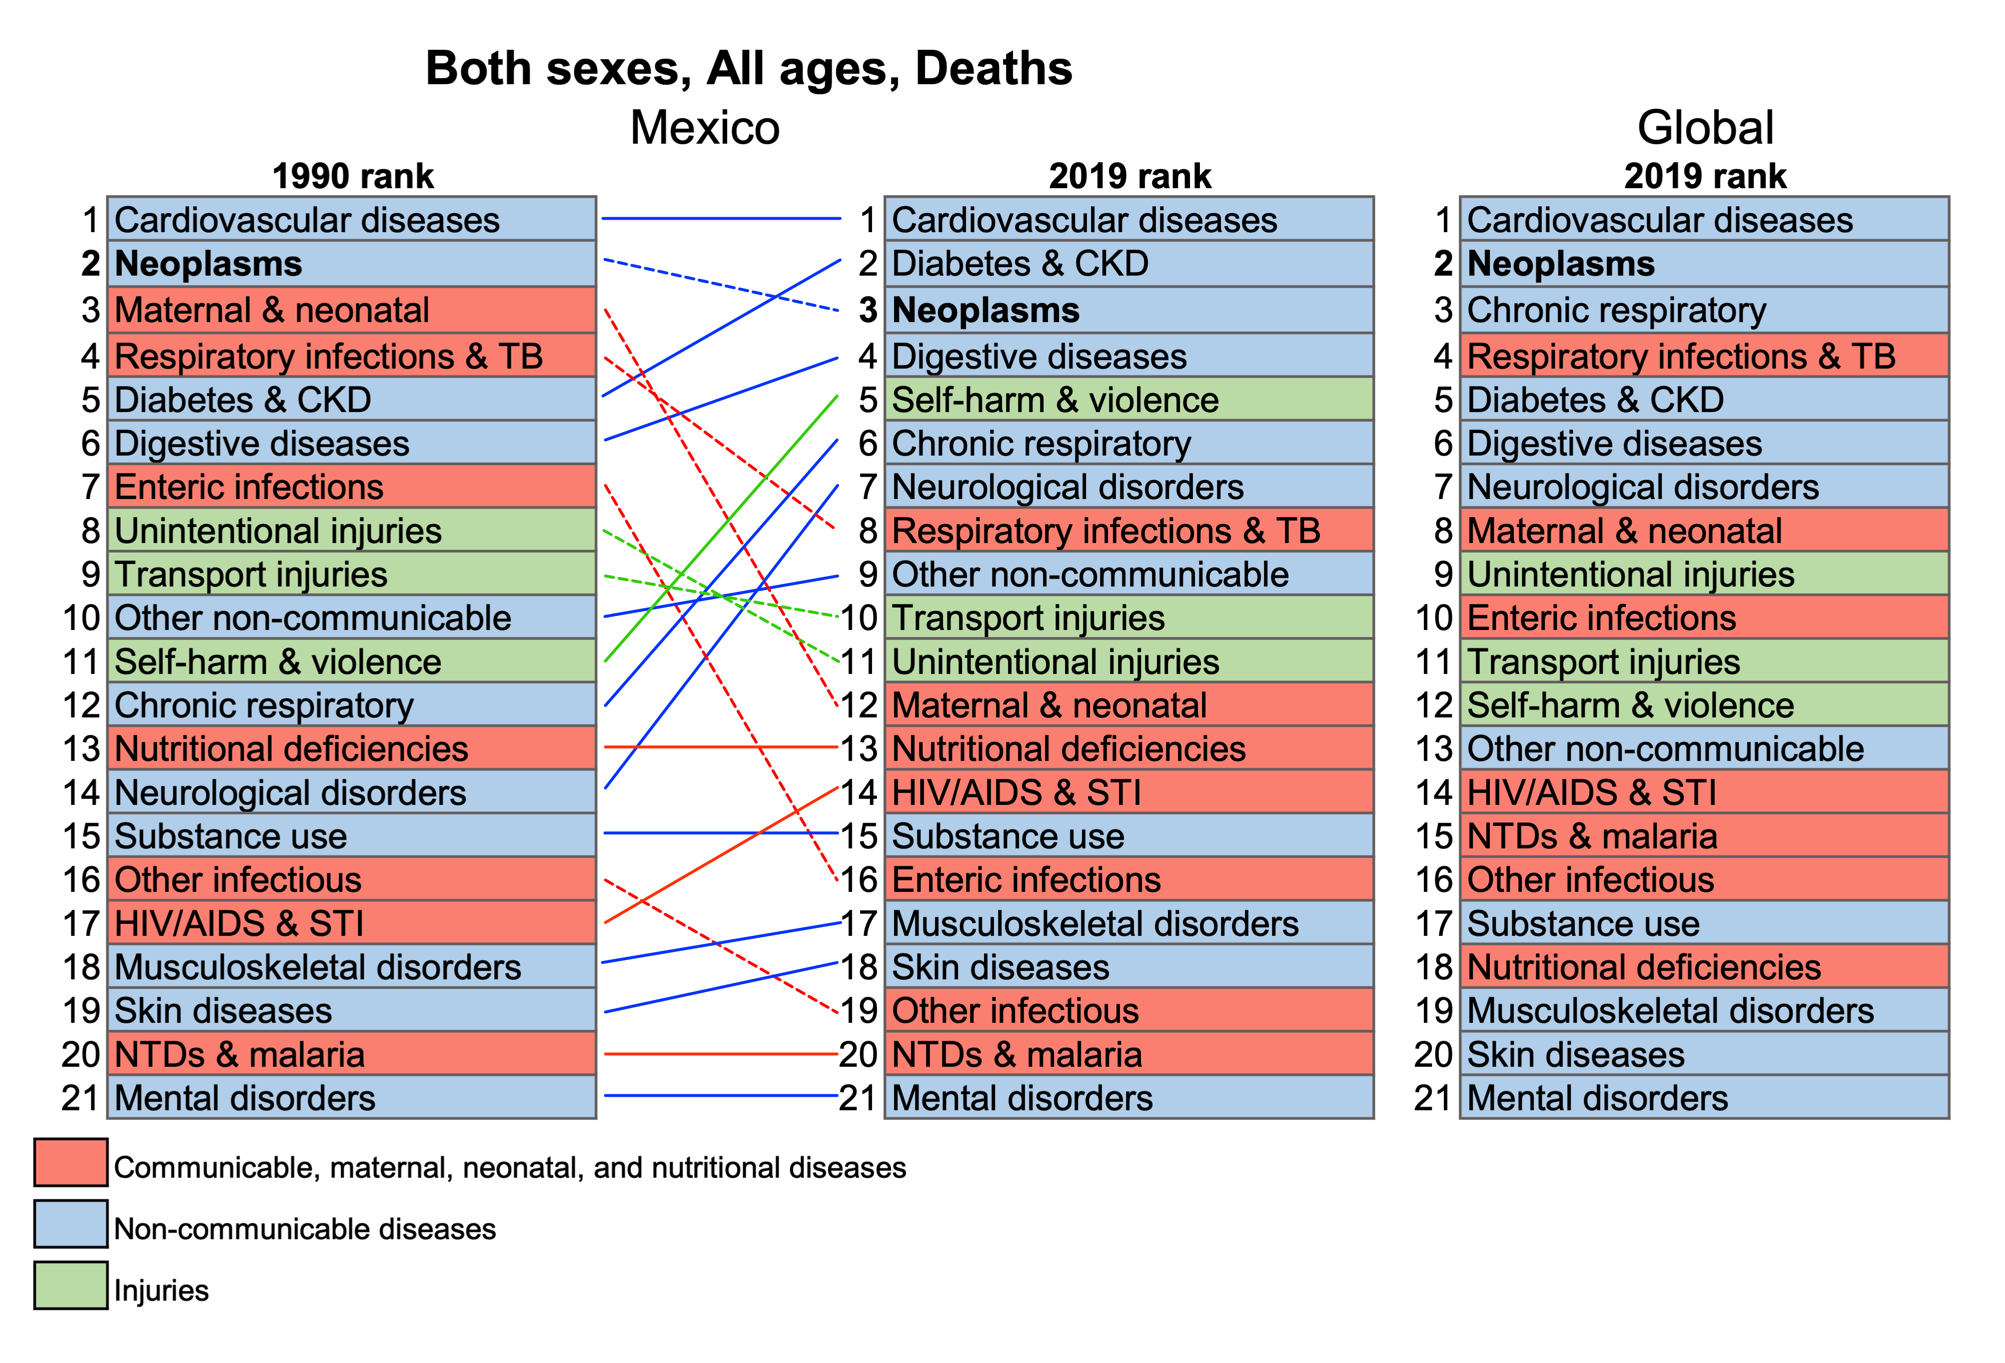


# **Supplementary Figure 2.** National rank for 1990 and 2019 and global rank for 2019 of the number of deaths due to the 21 groups of injuries and disease of the cause 2 level hierarchy of the GBD.


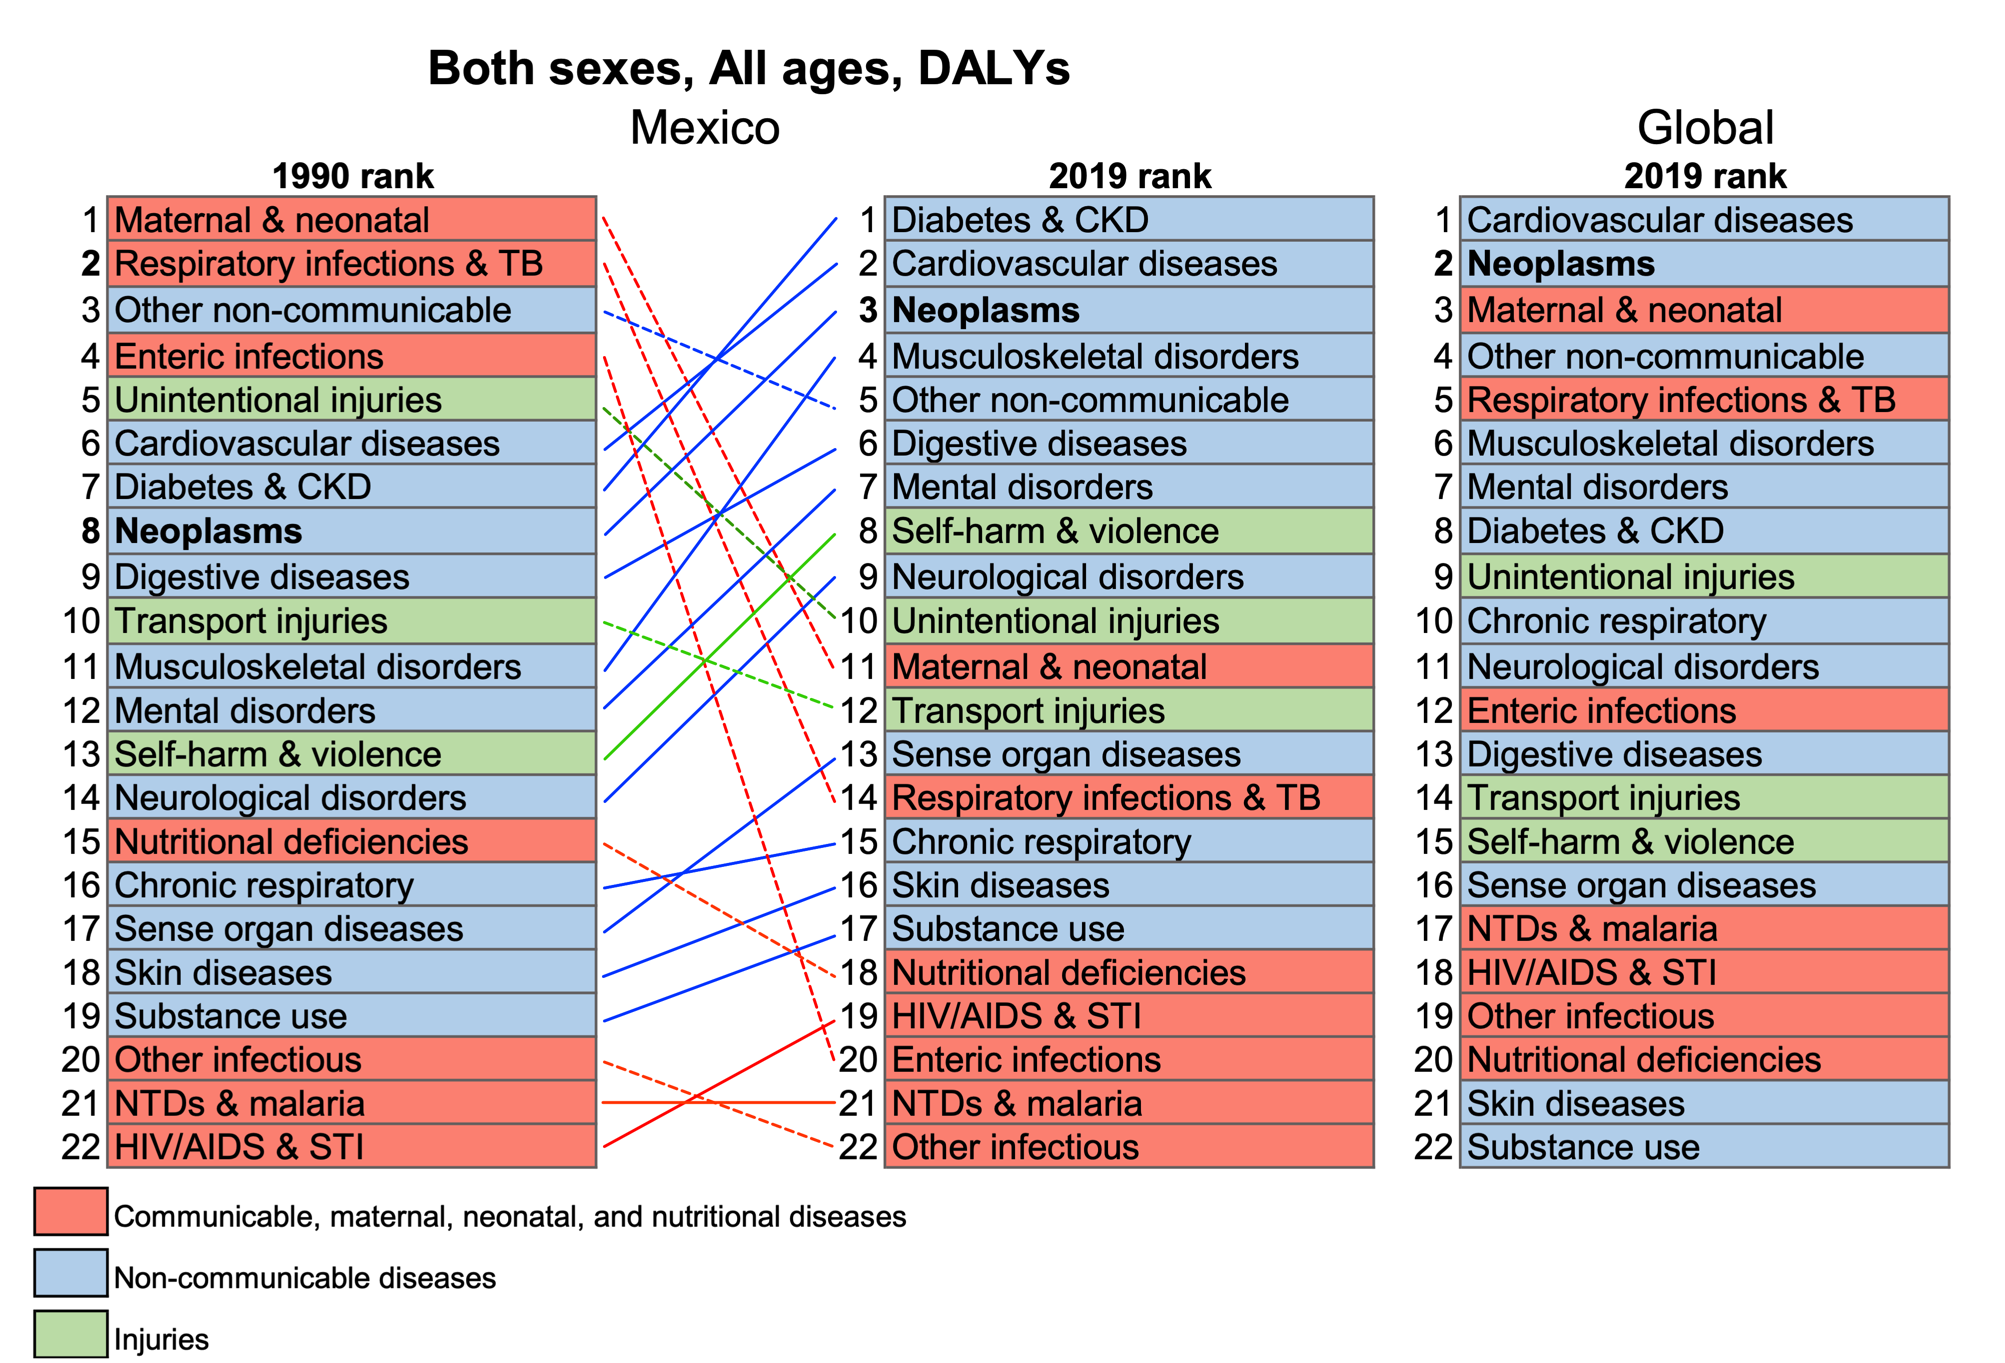


# **Supplementary Figure 3.** National rank for 1990 and 2019 and global rank for 2019 of the DALYs counts due to the 21 groups of injuries and disease of the cause 2 level hierarchy of the GBD.


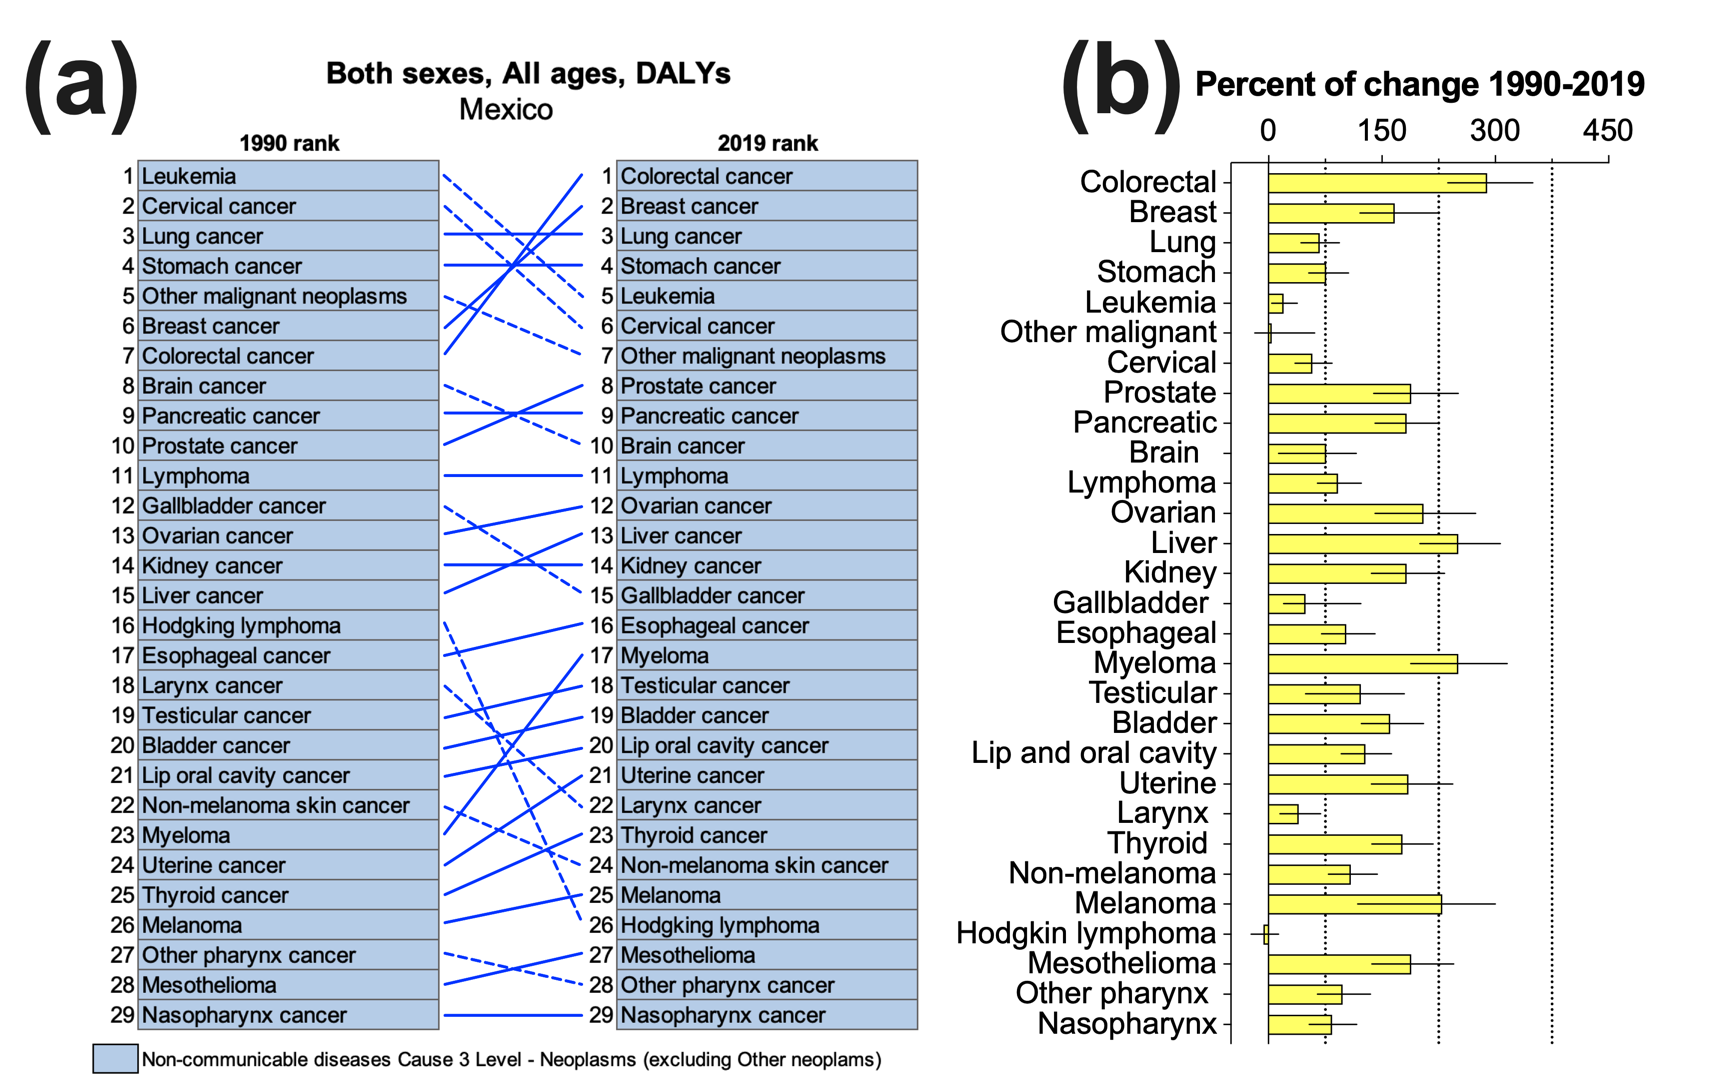


# **Supplementary Figure 4.** (a) National ranking and (b) percentage of annual change from 1990 to 2019 of the DALYs counts due to each of the 29 groups of malign neoplasms mapped by the GBD.


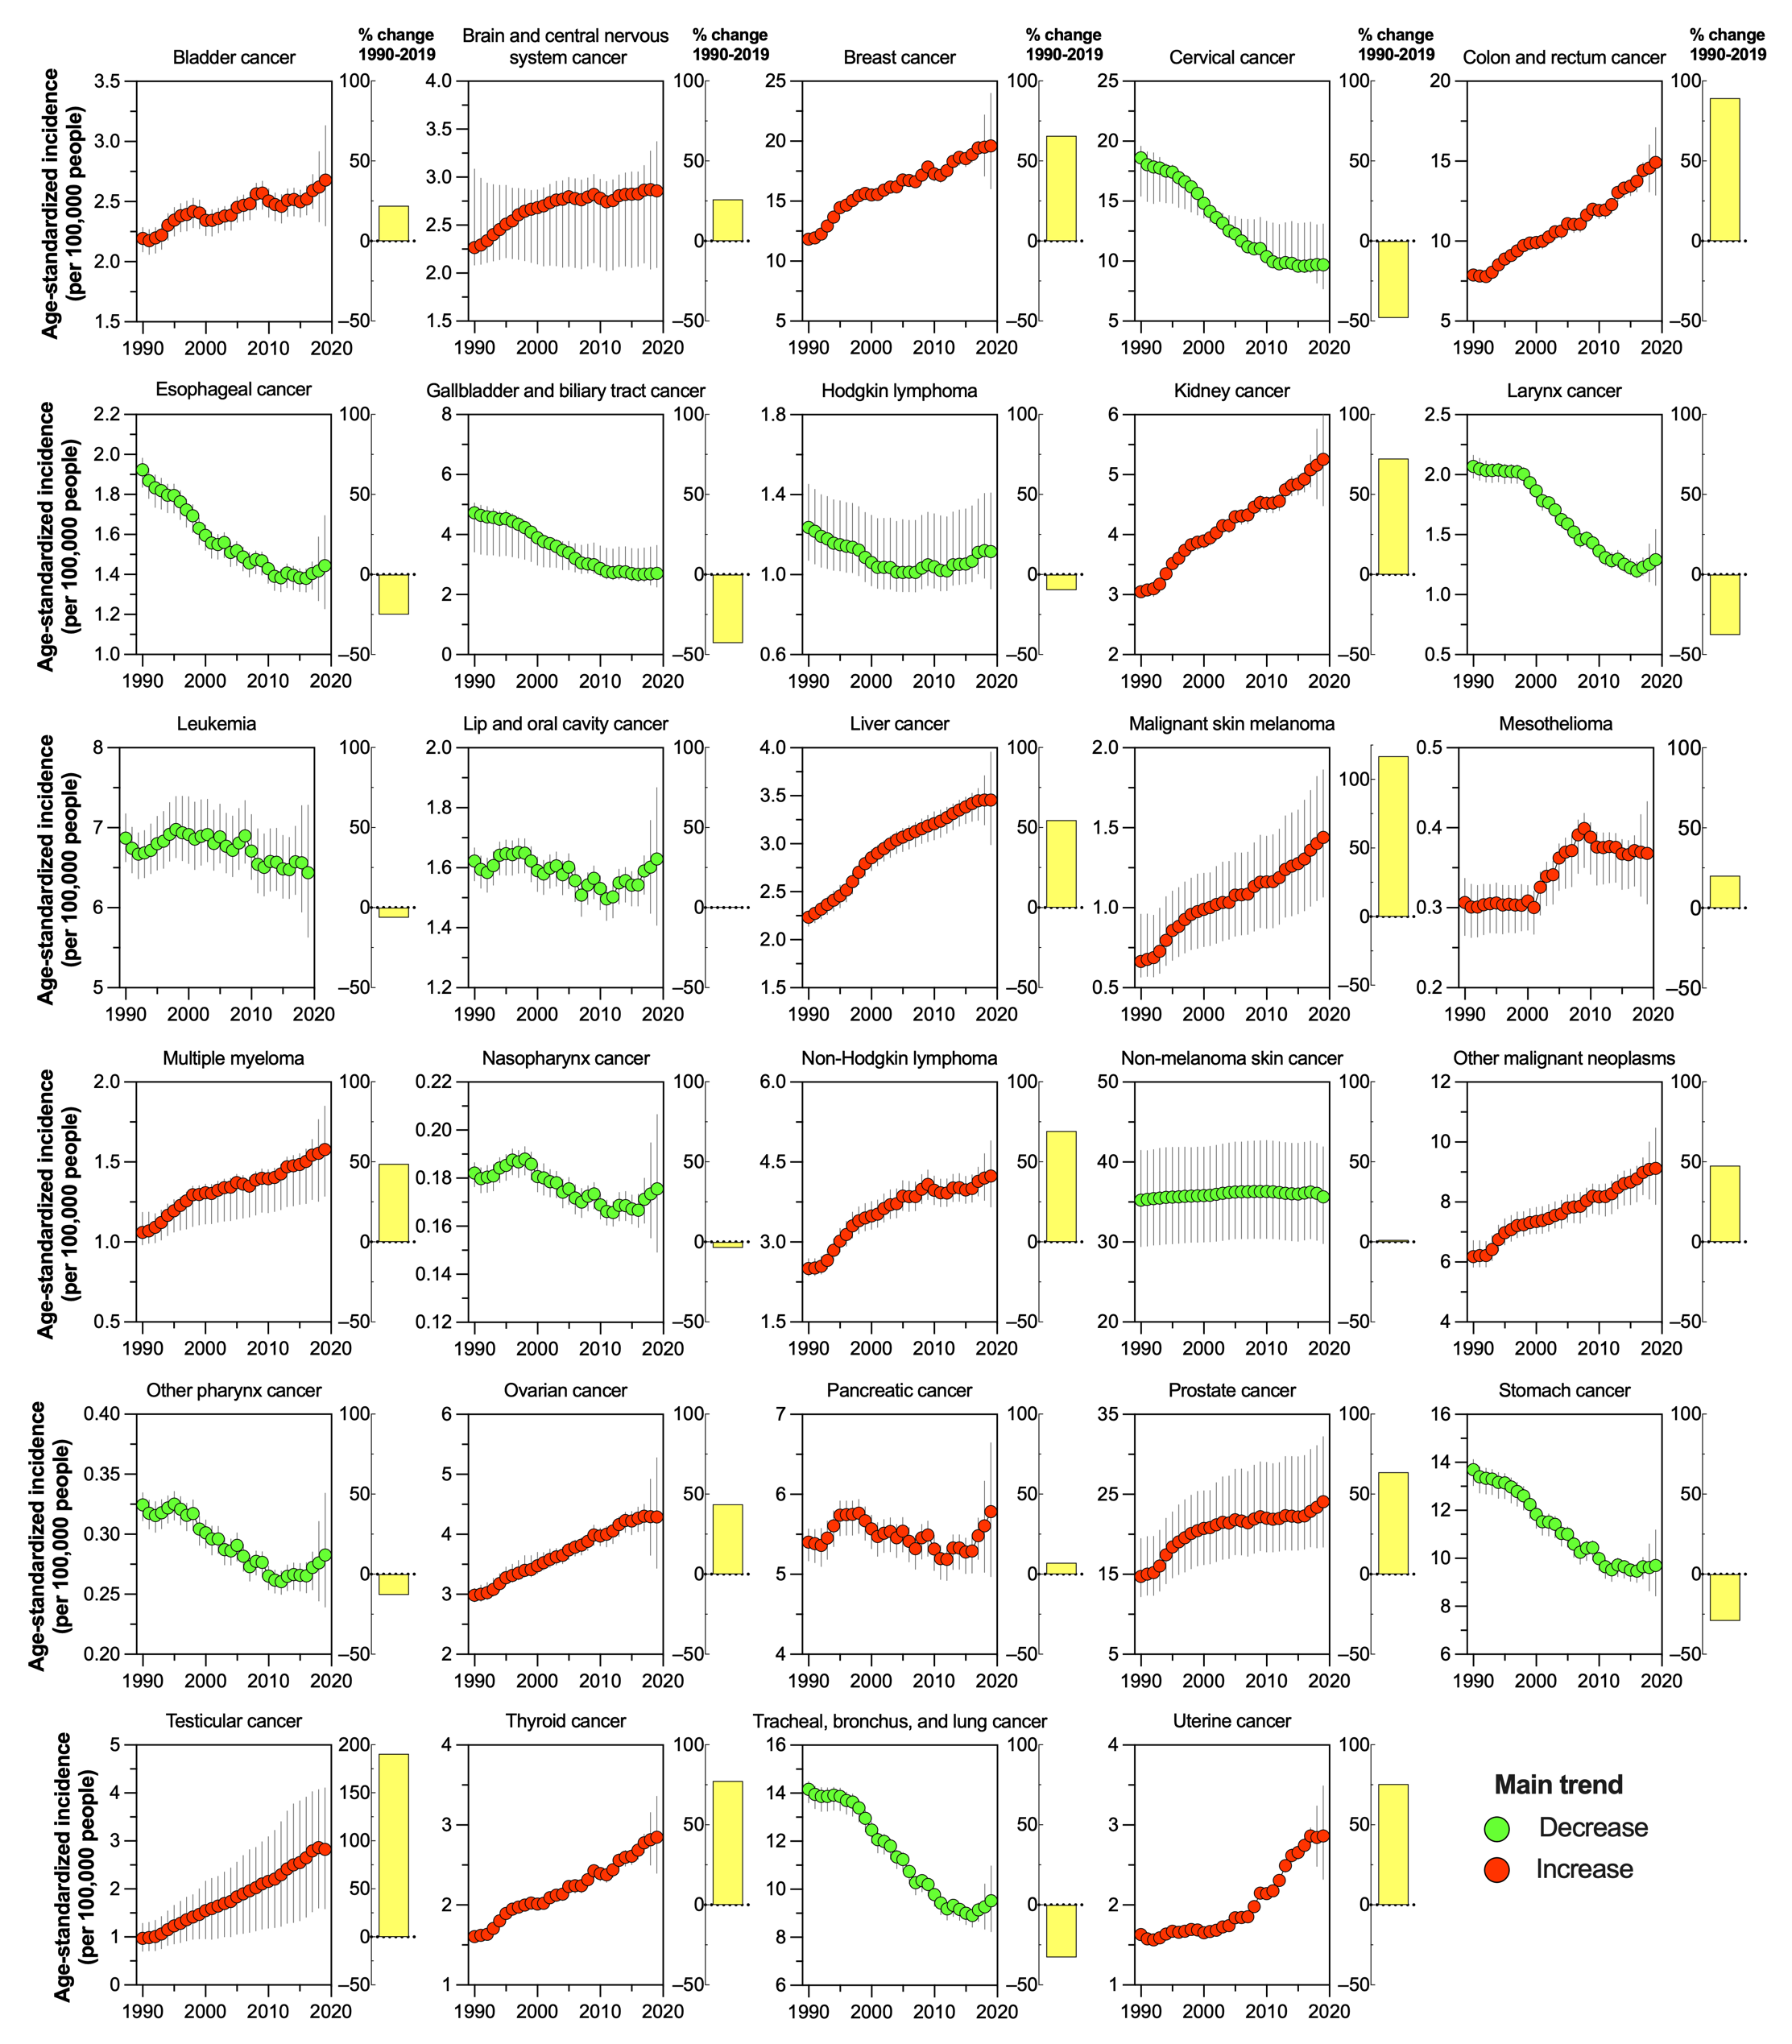


# **Supplementary Figure 5.** Cancer-specific trends and annual percentage of change from 1990 to 2019 of the age-standardized rate of incidence (per 100,000 people) in Mexico.


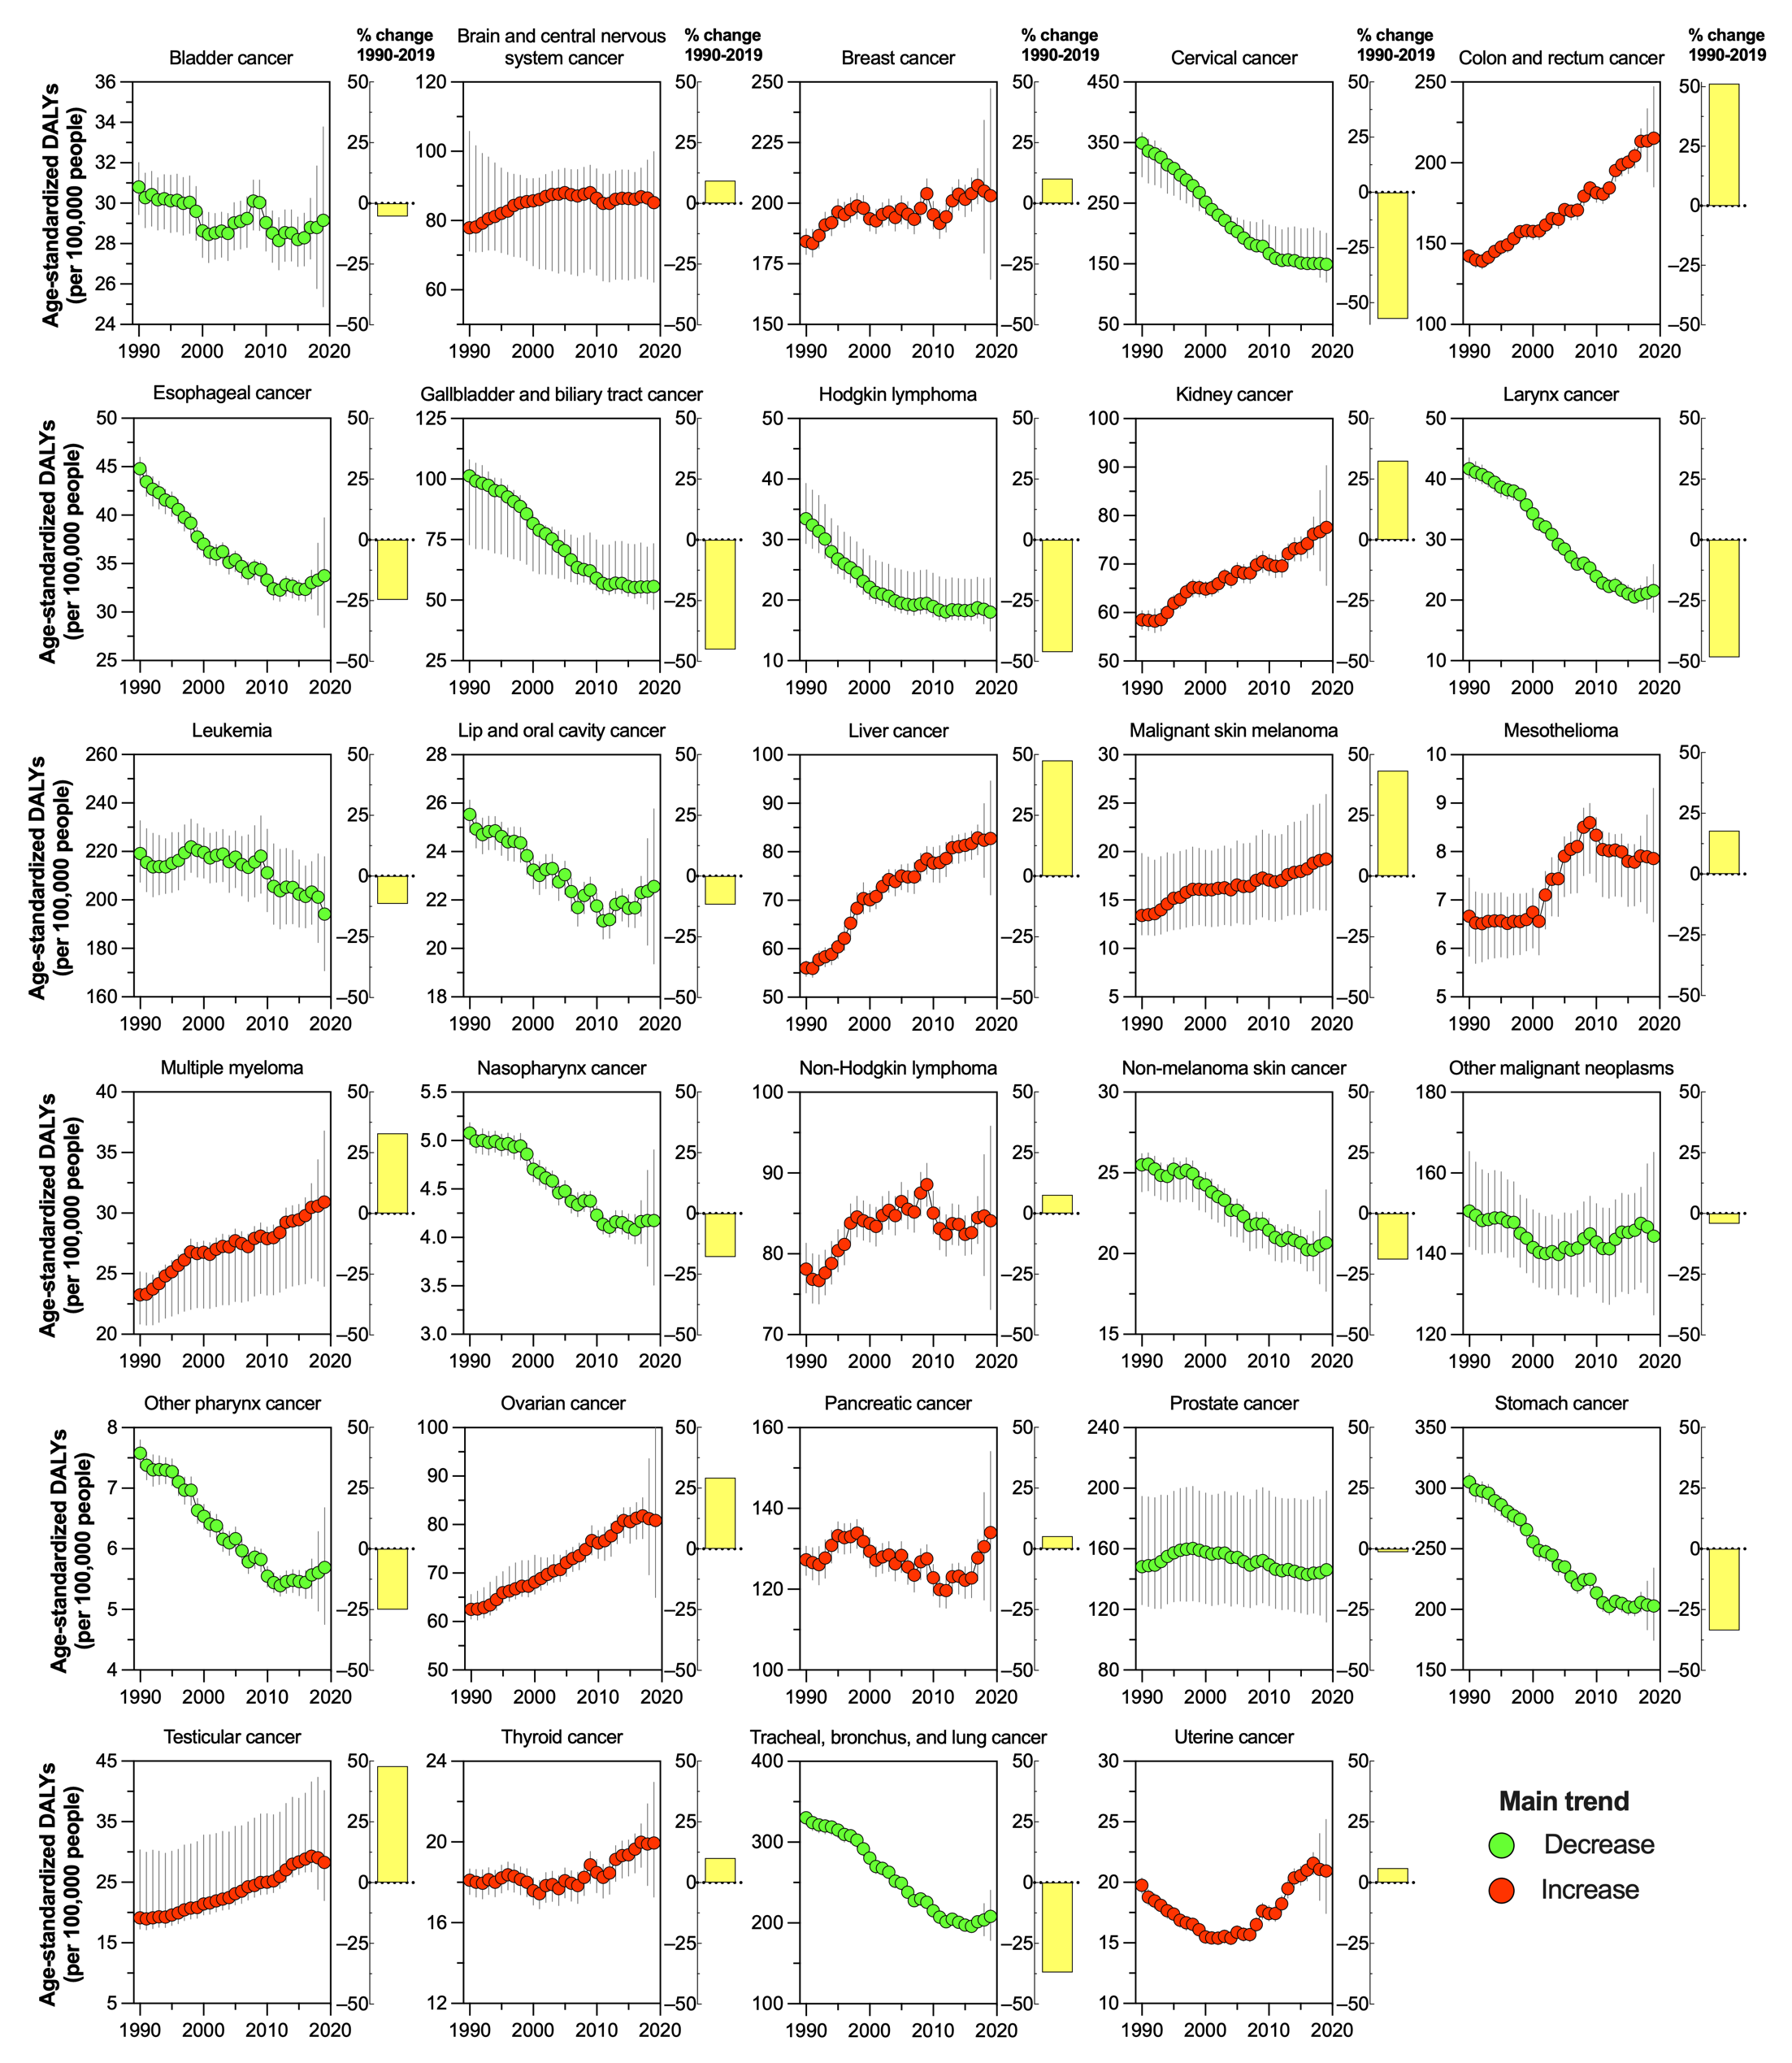


# **Supplementary Figure 6.** Cancer-specific trends and annual percentage of change from 1990 to 2019 of the age-standardized rate of DALYs (per 100,000 people) in Mexico.


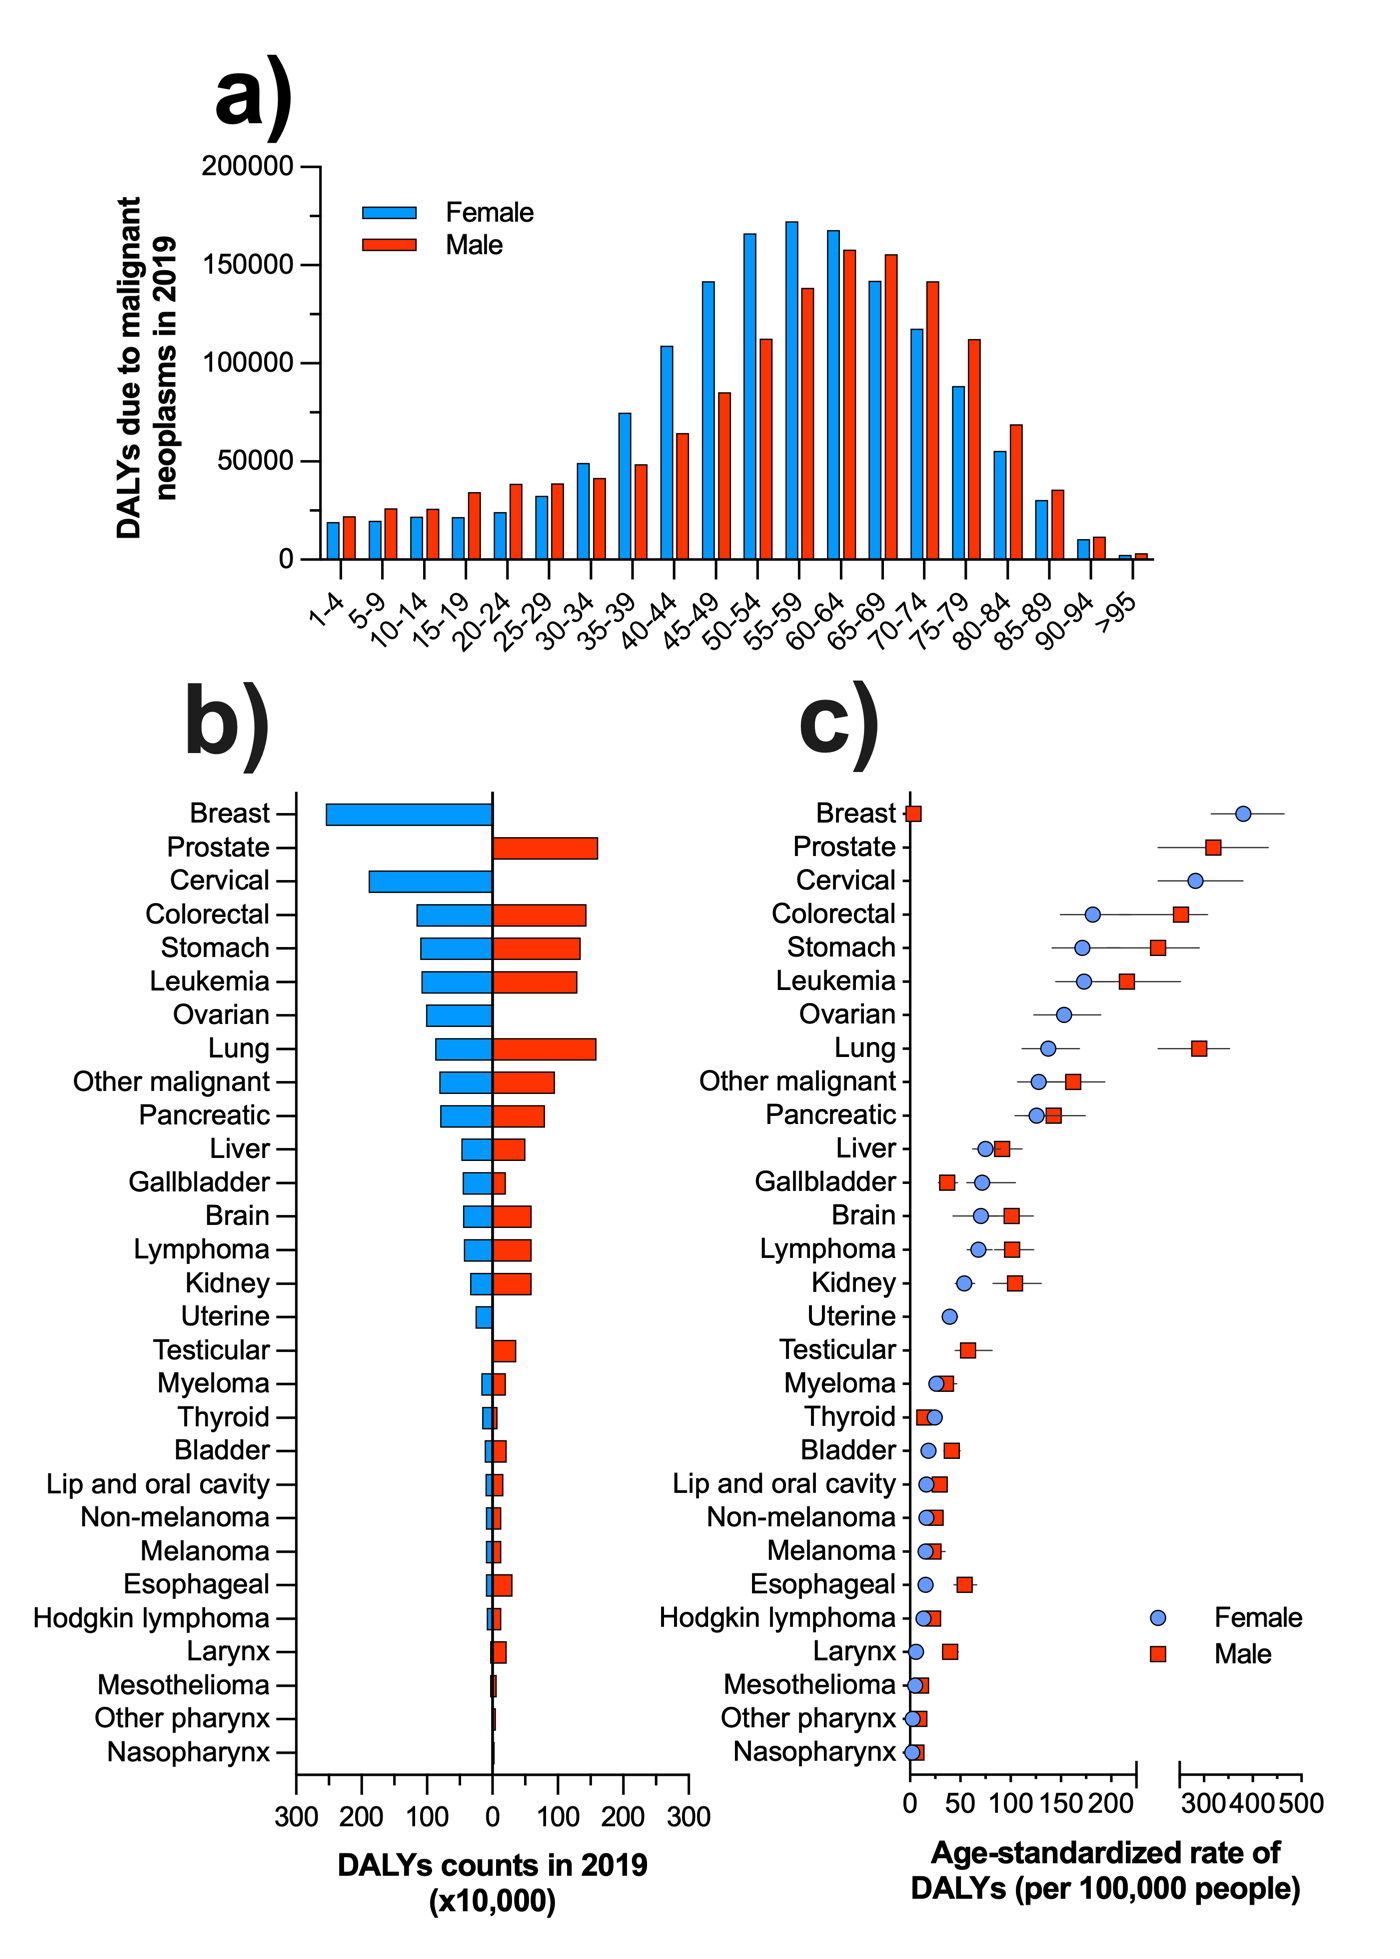


# **Supplementary Figure 7.** Sex and age-specific distribution of DALYs (a) due to malignant neoplasms in Mexico during 2019, cancer-specific DALYs counts (b) and age-standardized rate of death per 100,000 people (c) by sex.


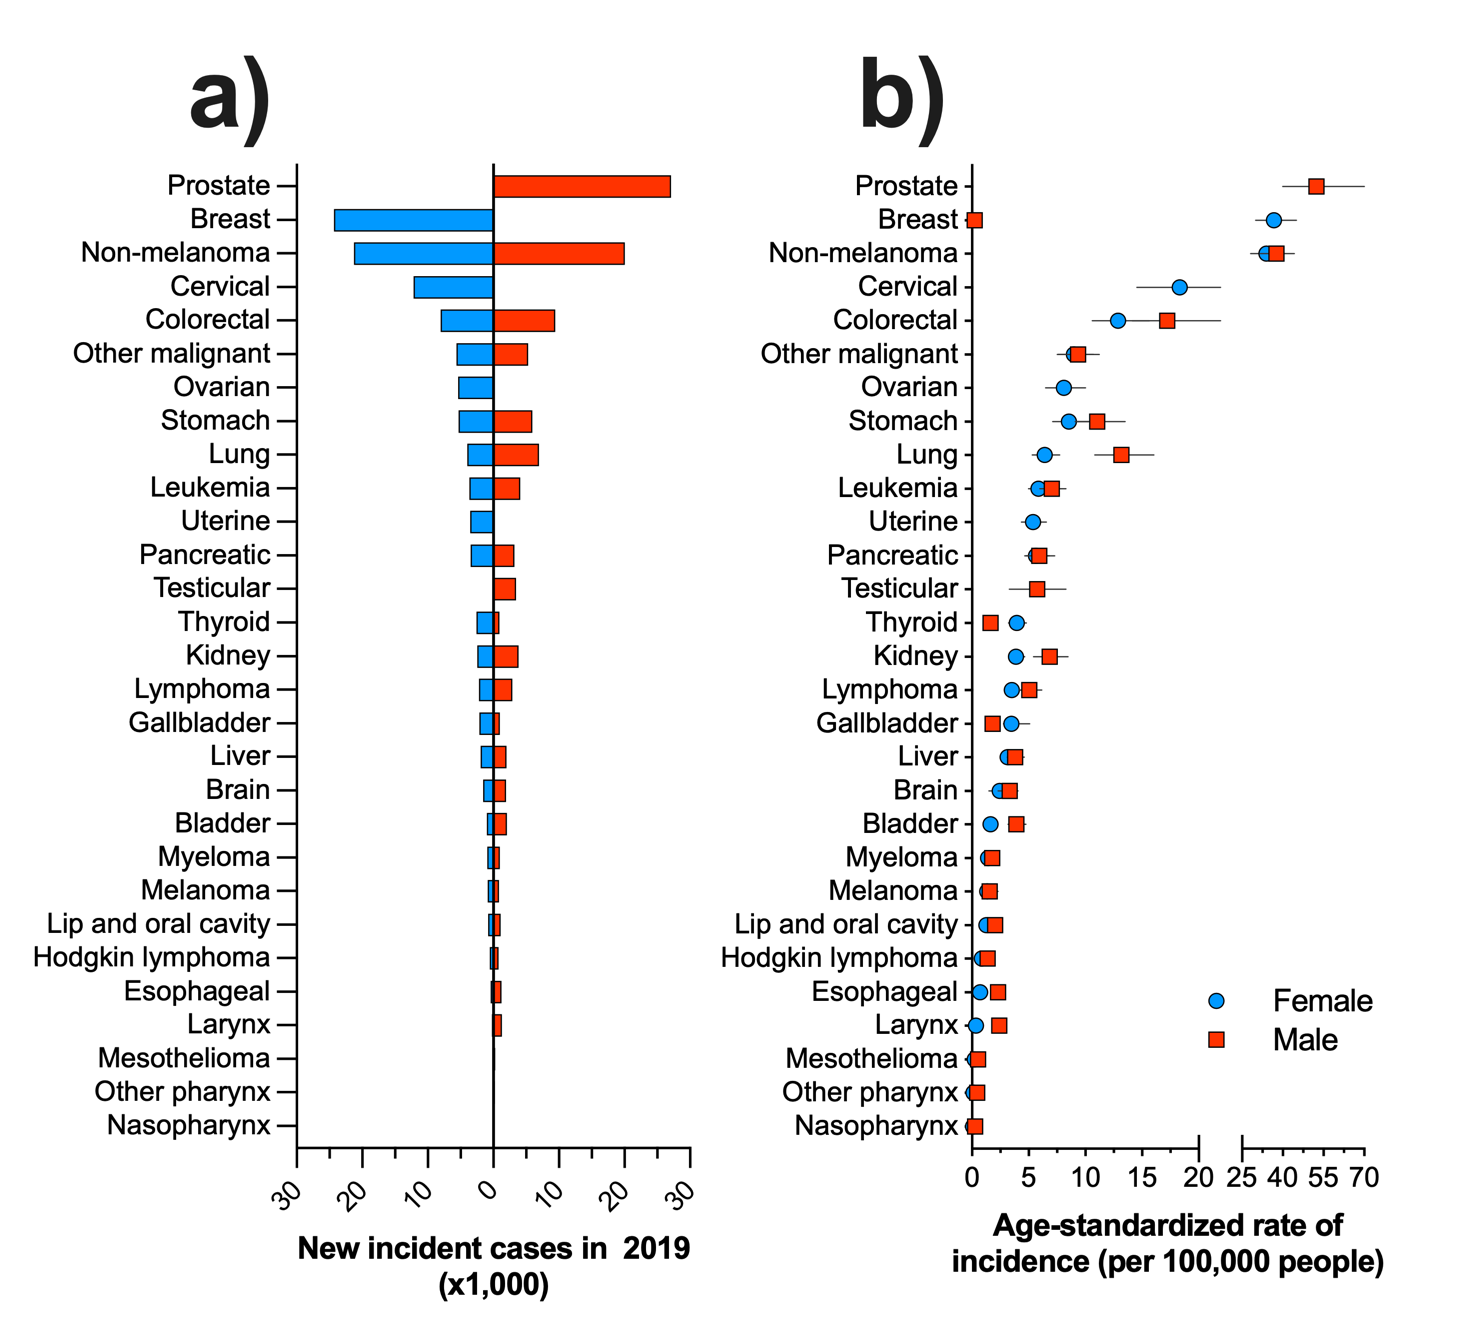


# **Supplementary Figure 8.** Cancer-specific incident cases and age-standardized rate of death (per 100,000 people) by sex (b) in Mexico during 2019.


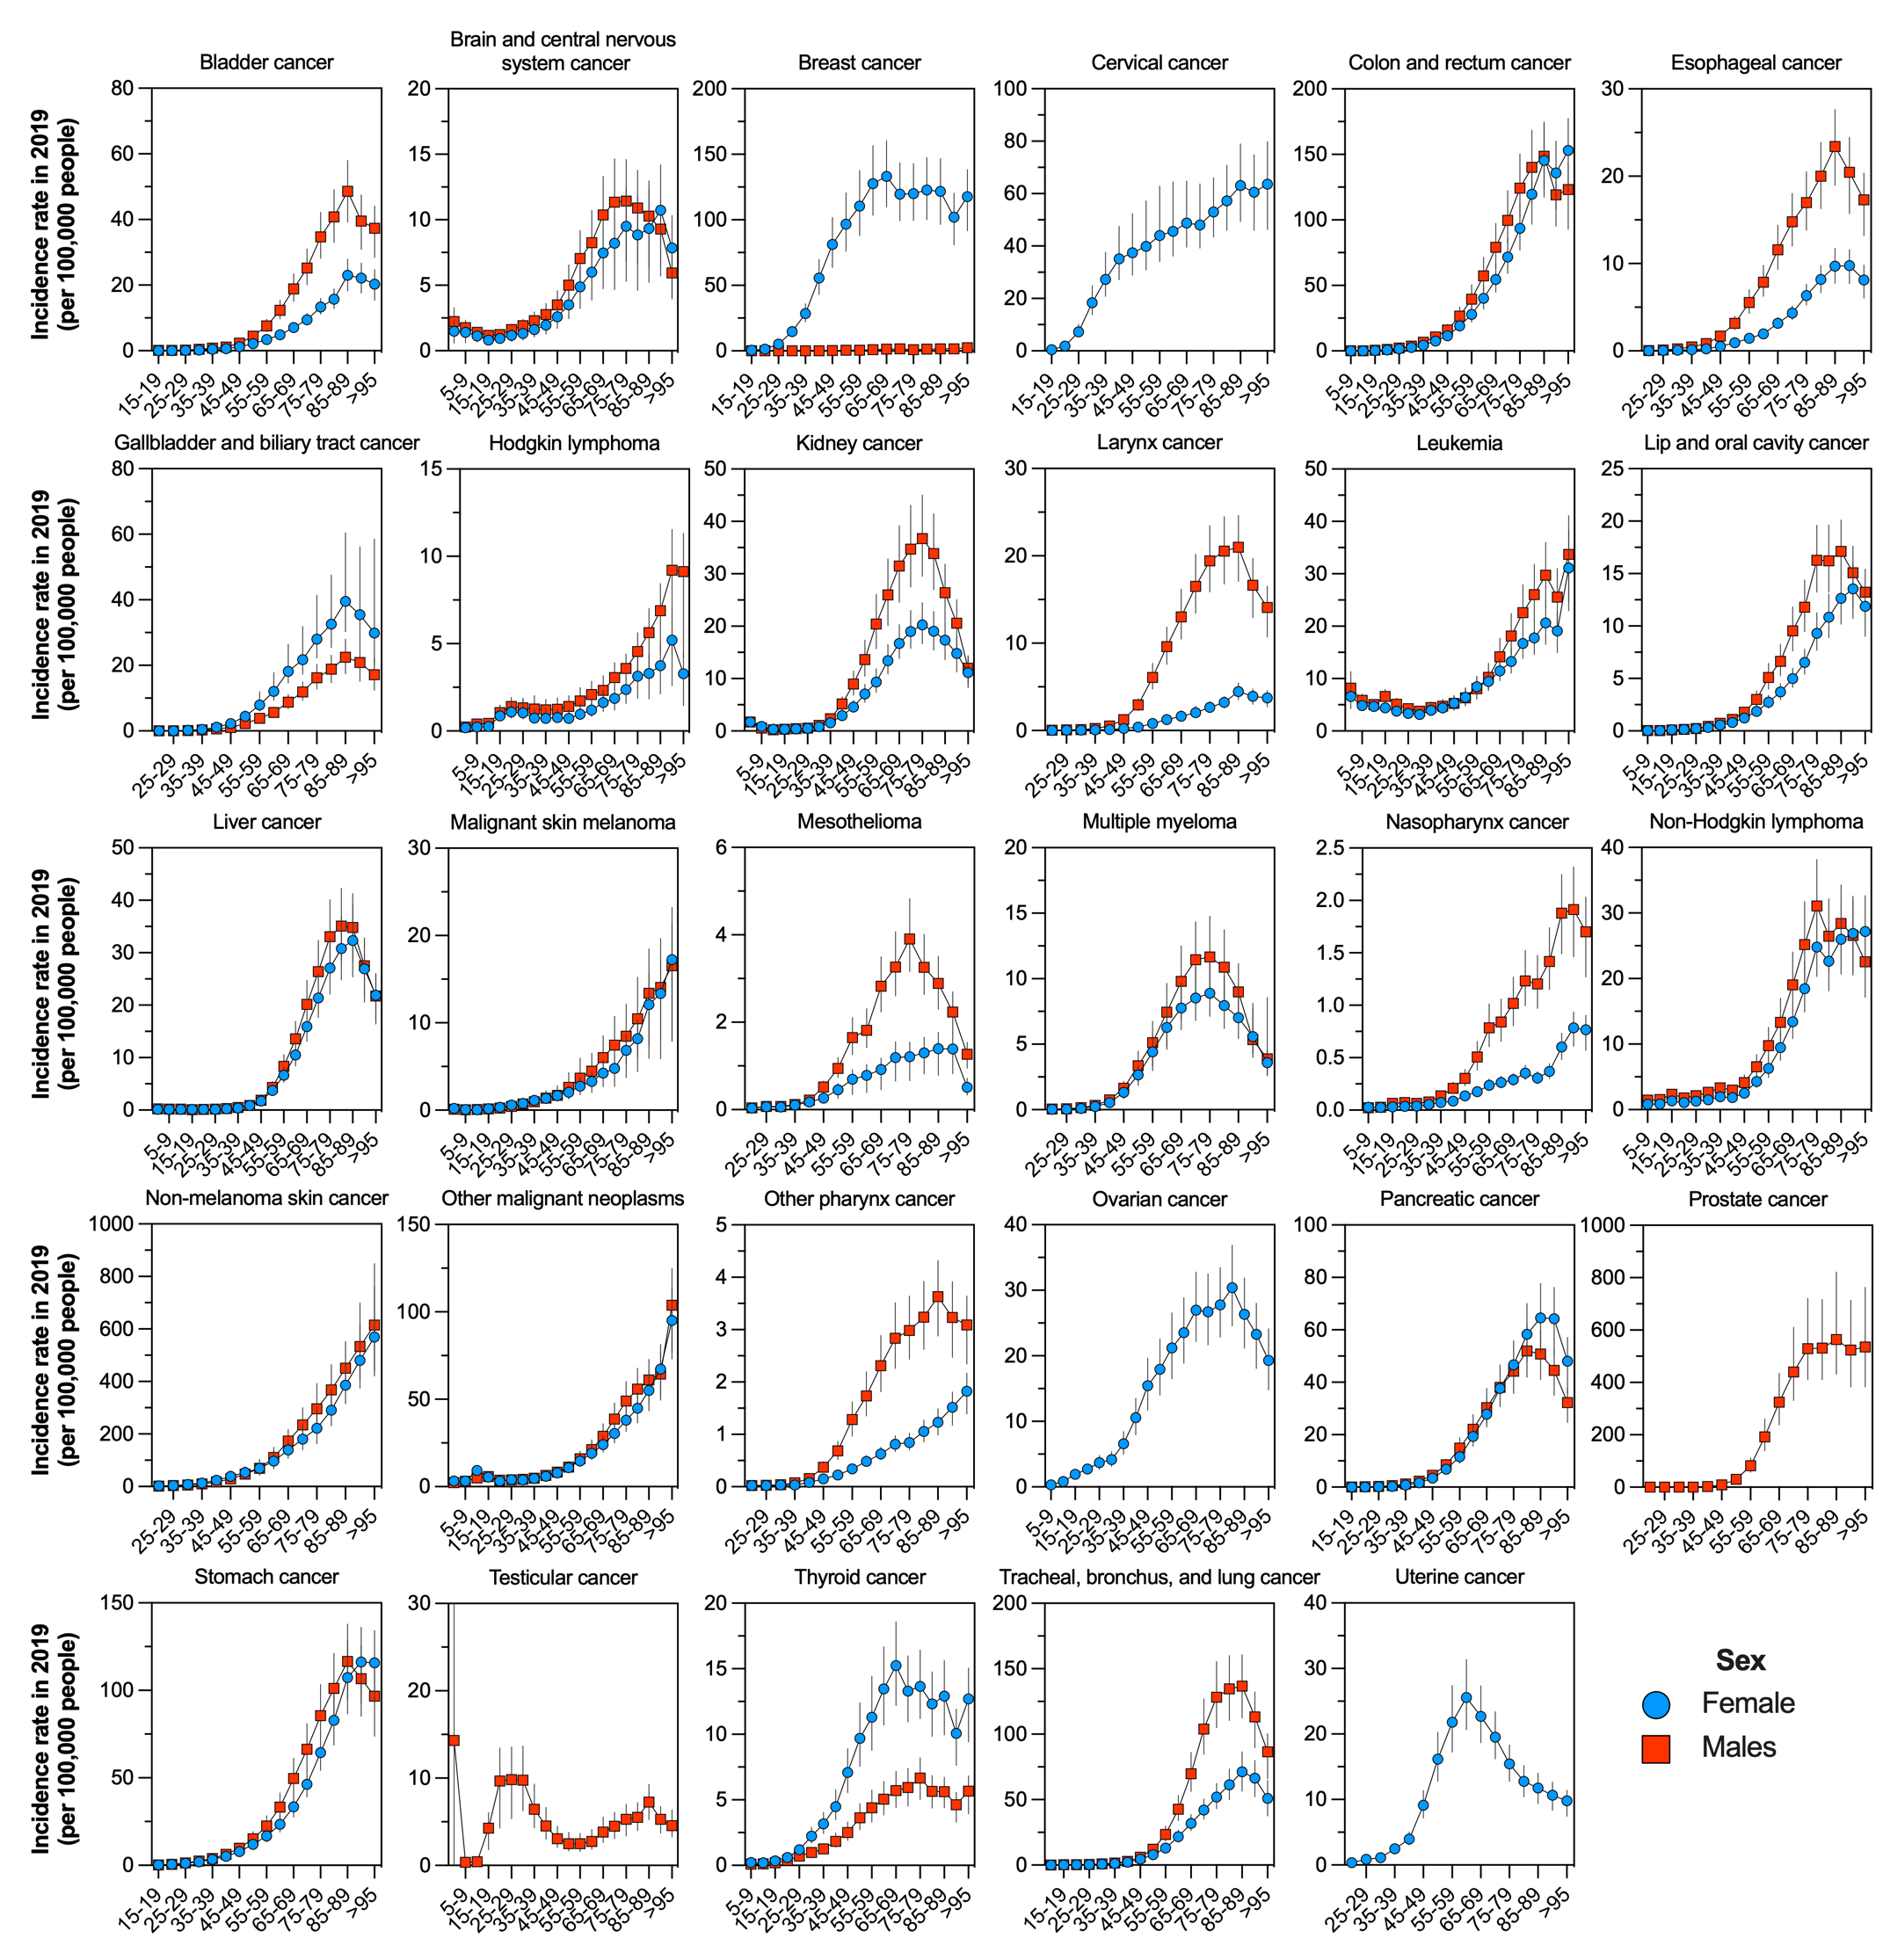


# **Supplementary Figure 9.** Age-specific rate of incidence (per 100,000 people) by sex for each group of cancer in Mexico during 2019.


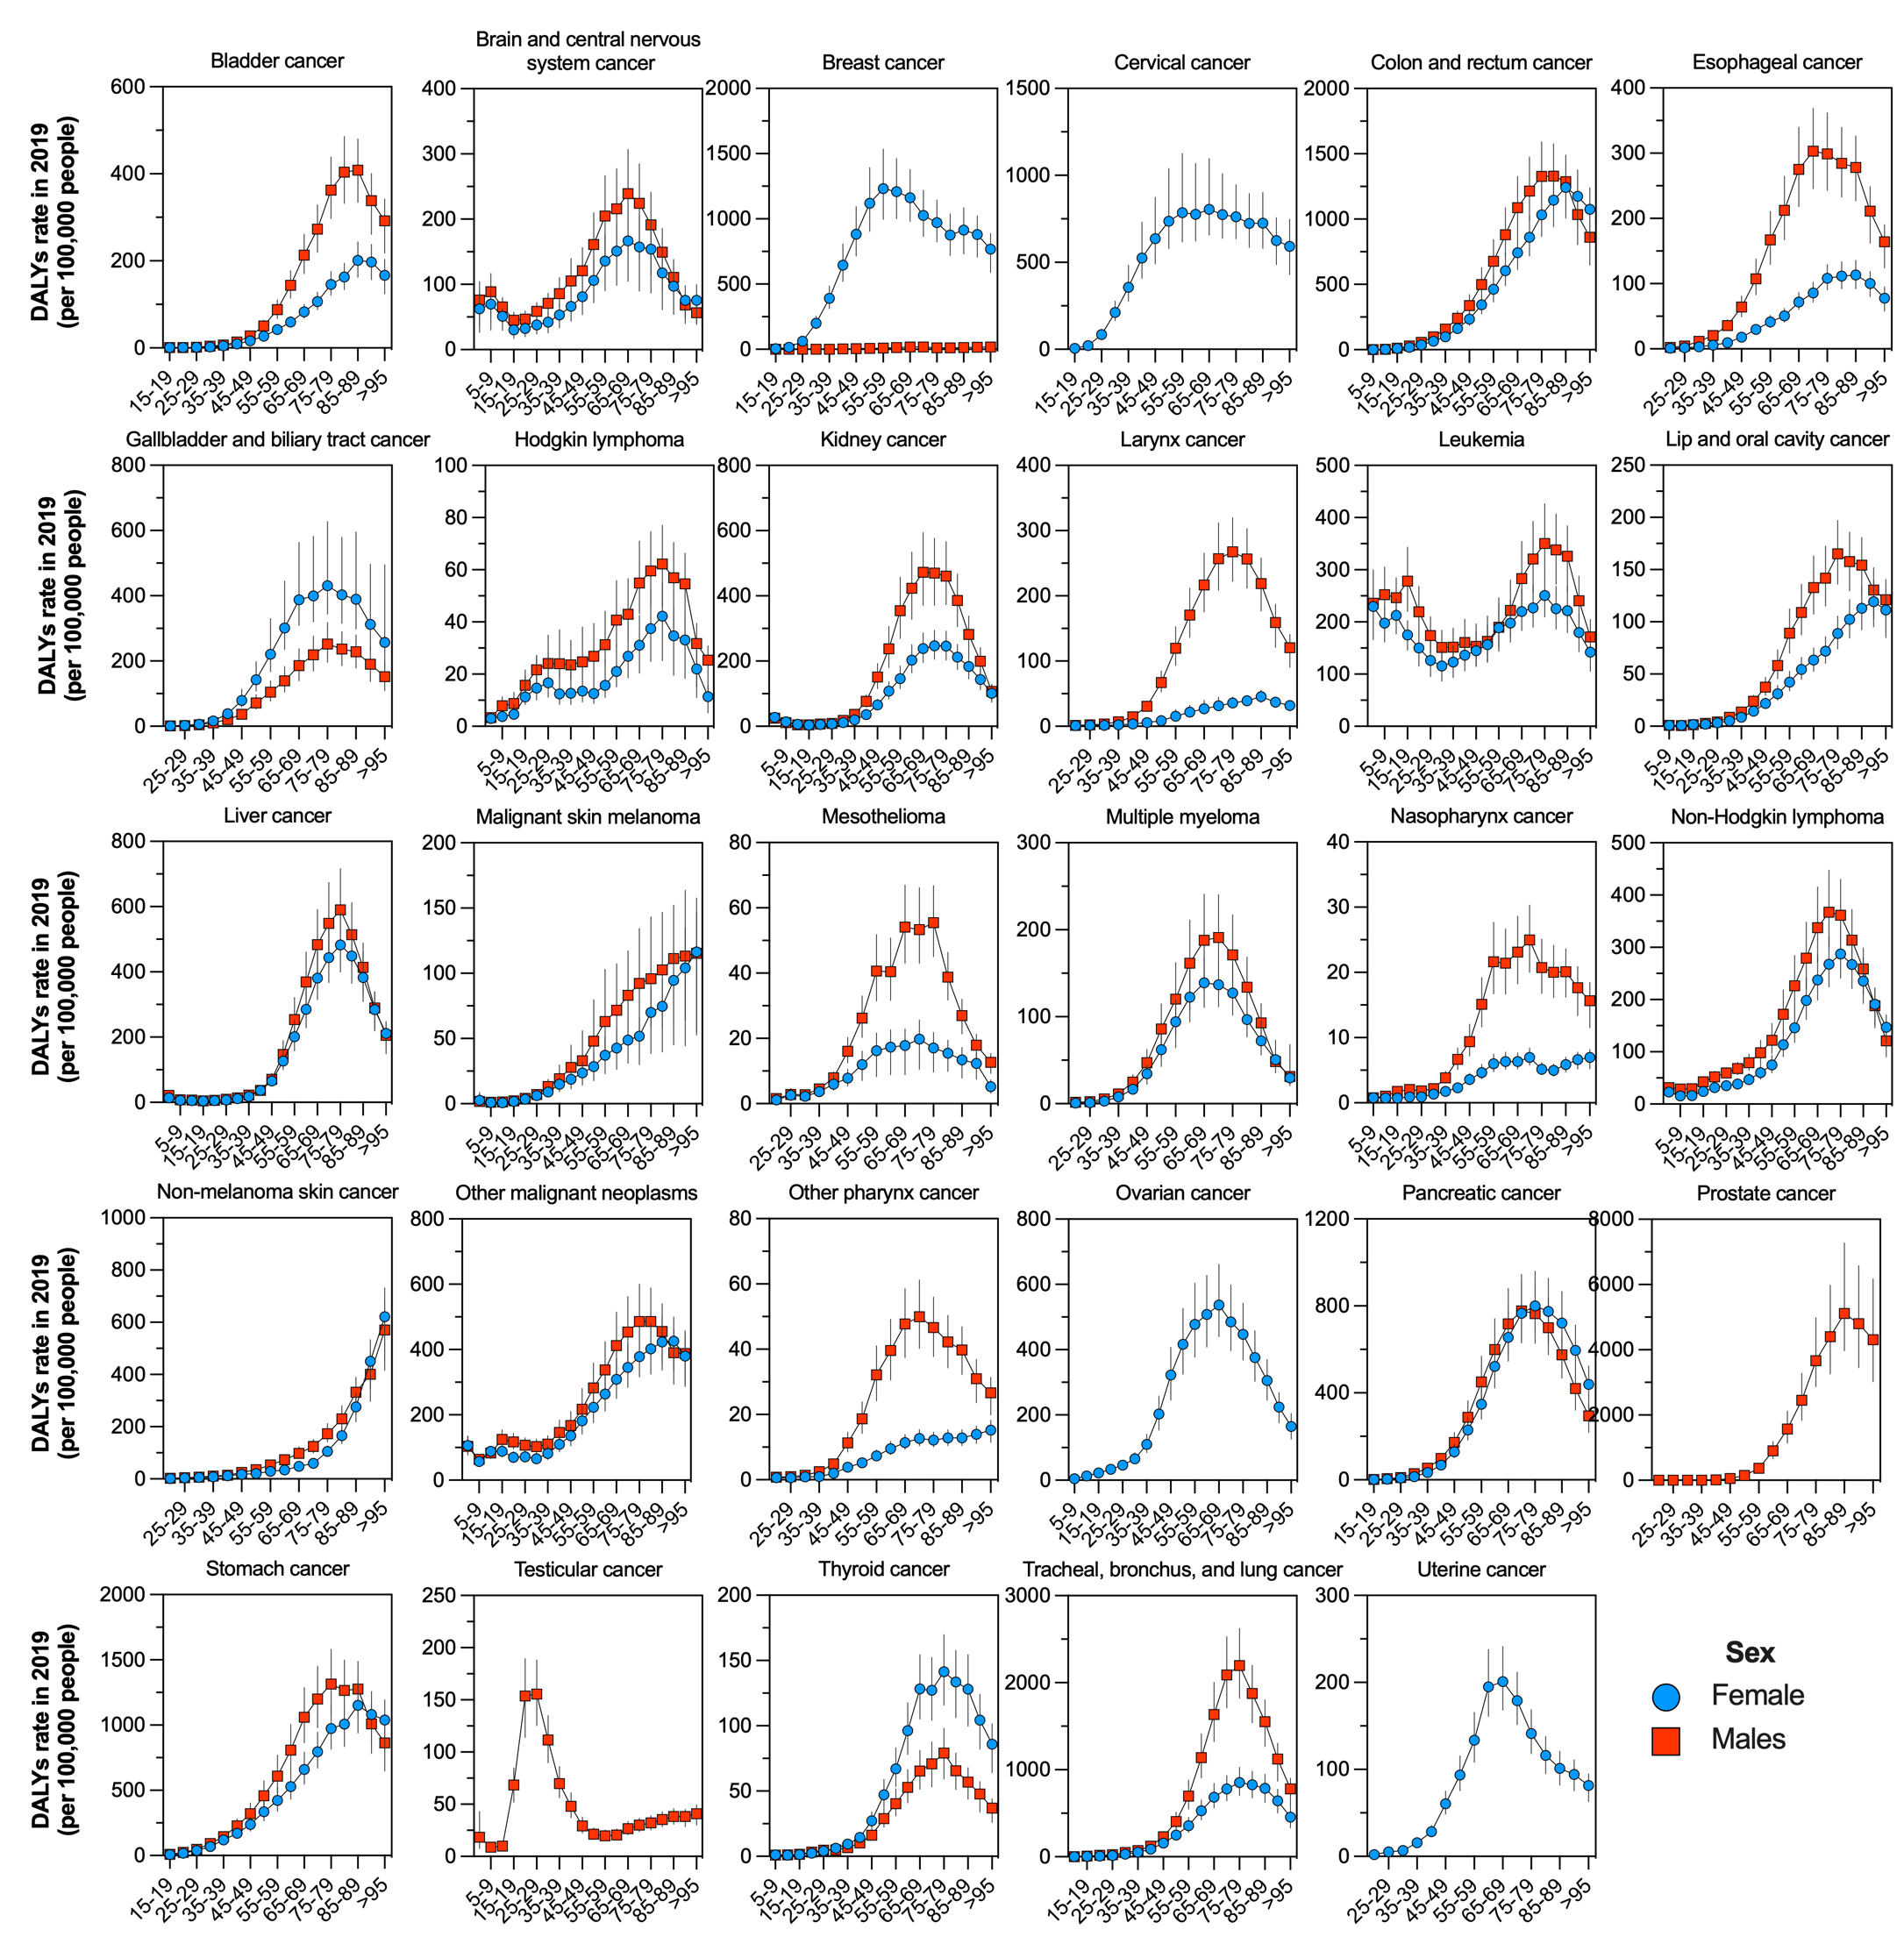


# **Supplementary Figure 10.** Age-specific rate of DALYs (per 100,000 people) by sex for each group of cancer in Mexico during 2019.

# **Supplementary Table 1.** Total and sex-specific age-standardized rate of incidence, mortality, and DALYs (per 100,000 people) by group of cancer in Mexico during 2019.

| **Group of cancer** | **Incidence (per 100,000 people: 95% UI)** | | |  | **Deaths (per 100,000 people: 95% UI)** | | |  | **DALYs (per 100,000 people: 95% UI)** | | |
| --- | --- | --- | --- | --- | --- | --- | --- | --- | --- | --- | --- |
| Total | Female | Male |  | Total | Female | Male |  | Total | Female | Male |
| Bladder cancer | 2.68 (2.30 to 3.13) | 1.64 (1.36 to 1.98) | 3.90 (3.17 to 4.76) |  | 1.52 (1.30 to 1.76) | 0.96 (0.80 to 1.16) | 2.19 (1.80 to 2.63) |  | 29.15 (24.88 to 33.78) | 18.48 (15.22 to 22.36) | 41.60 (33.80 to 49.91) |
| Brain and central nervous system cancer | 2.86 (2.06 to 3.37) | 2.44 (1.50 to 3.08) | 3.31 (2.31 to 4.07) |  | 2.31 (1.68 to 2.72) | 1.94 (1.19 to 2.44) | 2.72 (1.90 to 3.36) |  | 85.20 (62.23 to 99.97) | 70.58 (42.69 to 87.99) | 100.94 (71.58 to 122.58) |
| Breast cancer | 19.62 (16.03 to 23.99) | 36.81 (30.02 to 45.04) | 0.23 (0.19 to 0.29) |  | 6.72 (5.59 to 8.14) | 12.48 (10.35 to 15.16) | 0.14 (0.11 to 0.17) |  | 203.09 (168.58 to 247.33) | 381.13 (315.67 to 464.65) | 3.46 (2.83 to 4.22) |
| Cervical cancer | 9.68 (7.68 to 13.11) | 18.34 (14.55 to 24.83) | - |  | 5.08 (4.10 to 6.74) | 9.53 (7.68 to 12.64) | - |  | 149.44 (119.51 to 200.73) | 282.99 (226.19 to 380.52) | - |
| Colon and rectum cancer | 14.92 (12.88 to 17.11) | 12.90 (10.60 to 15.63) | 17.22 (14.15 to 21.16) |  | 9.24 (7.95 to 10.52) | 8.09 (6.70 to 9.66) | 10.55 (8.69 to 12.73) |  | 215.34 (185.07 to 247.20) | 181.66 (149.57 to 219.77) | 253.26 (208.33 to 307.28) |
| Esophageal cancer | 1.44 (1.23 to 1.69) | 0.72 (0.60 to 0.87) | 2.28 (1.85 to 2.78) |  | 1.51 (1.28 to 1.75) | 0.75 (0.62 to 0.90) | 2.40 (1.93 to 2.91) |  | 33.75 (28.42 to 39.73) | 15.68 (13.02 to 18.95) | 54.38 (43.49 to 66.56) |
| Gallbladder and biliary tract cancer | 2.71 (2.25 to 3.64) | 3.46 (2.76 to 5.09) | 1.83 (1.44 to 2.31) |  | 2.57 (2.14 to 3.43) | 3.28 (2.59 to 4.83) | 1.74 (1.35 to 2.20) |  | 55.62 (46.16 to 73.34) | 71.83 (56.58 to 104.93) | 37.06 (28.34 to 47.51) |
| Hodgkin lymphoma | 1.11 (0.93 to 1.41) | 0.88 (0.67 to 1.33) | 1.37 (1.09 to 1.75) |  | 0.53 (0.44 to 0.67) | 0.40 (0.30 to 0.57) | 0.67 (0.53 to 0.85) |  | 18.01 (14.91 to 23.70) | 13.47 (10.23 to 20.66) | 22.96 (18.19 to 30.21) |
| Kidney cancer | 5.26 (4.48 to 6.13) | 3.87 (3.22 to 4.66) | 6.85 (5.44 to 8.46) |  | 2.97 (2.51 to 3.46) | 2.07 (1.72 to 2.49) | 4.01 (3.15 to 4.99) |  | 77.55 (65.61 to 90.34) | 53.91 (45.01 to 64.50) | 104.40 (82.41 to 130.46) |
| Larynx cancer | 1.29 (1.08 to 1.54) | 0.35 (0.28 to 0.47) | 2.39 (1.93 to 2.91) |  | 0.99 (0.82 to 1.18) | 0.27 (0.22 to 0.36) | 1.84 (1.49 to 2.22) |  | 21.59 (18.01 to 25.89) | 5.86 (4.75 to 8.43) | 39.71 (32.17 to 48.32) |
| Leukemia | 6.44 (5.63 to 7.28) | 5.88 (4.98 to 6.93) | 7.04 (5.96 to 8.29) |  | 4.37 (3.84 to 4.95) | 3.88 (3.30 to 4.56) | 4.92 (4.11 to 5.85) |  | 194.13 (170.74 to 217.87) | 173.23 (144.96 to 202.95) | 215.90 (184.37 to 252.05) |
| Lip and oral cavity cancer | 1.63 (1.41 to 1.87) | 1.26 (1.05 to 1.52) | 2.05 (1.67 to 2.49) |  | 0.98 (0.84 to 1.11) | 0.72 (0.60 to 0.87) | 1.27 (1.05 to 1.53) |  | 22.56 (19.36 to 25.77) | 16.33 (13.59 to 19.78) | 29.66 (24.41 to 36.13) |
| Liver cancer | 3.46 (2.99 to 3.96) | 3.15 (2.62 to 3.80) | 3.81 (3.12 to 4.62) |  | 3.69 (3.18 to 4.22) | 3.37 (2.79 to 4.05) | 4.06 (3.31 to 4.92) |  | 82.76 (71.12 to 94.63) | 74.96 (62.15 to 89.79) | 91.58 (74.68 to 111.39) |
| Malignant skin melanoma | 1.44 (1.07 to 1.86) | 1.33 (0.80 to 1.75) | 1.57 (0.98 to 2.28) |  | 0.76 (0.54 to 1.00) | 0.62 (0.36 to 0.81) | 0.92 (0.57 to 1.36) |  | 19.23 (13.93 to 25.91) | 15.57 (9.55 to 20.34) | 23.37 (14.74 to 35.15) |
| Mesothelioma | 0.37 (0.30 to 0.43) | 0.23 (0.14 to 0.29) | 0.53 (0.43 to 0.65) |  | 0.30 (0.25 to 0.35) | 0.18 (0.11 to 0.23) | 0.44 (0.35 to 0.53) |  | 7.86 (6.55 to 9.31) | 4.97 (3.06 to 6.36) | 11.14 (9.03 to 13.60) |
| Multiple myeloma | 1.58 (1.28 to 1.85) | 1.41 (1.10 to 1.73) | 1.77 (1.26 to 2.25) |  | 1.24 (0.99 to 1.47) | 1.06 (0.85 to 1.31) | 1.43 (1.02 to 1.83) |  | 30.92 (23.96 to 36.78) | 26.47 (20.67 to 32.69) | 35.97 (24.88 to 46.43) |
| Nasopharynx cancer | 0.18 (0.15 to 0.21) | 0.10 (0.08 to 0.12) | 0.27 (0.21 to 0.33) |  | 0.15 (0.12 to 0.17) | 0.07 (0.06 to 0.09) | 0.23 (0.19 to 0.29) |  | 4.17 (3.51 to 4.91) | 2.17 (1.78 to 2.62) | 6.44 (5.09 to 7.91) |
| Non-Hodgkin lymphoma | 4.24 (3.66 to 4.90) | 3.50 (2.89 to 4.28) | 5.05 (4.13 to 6.14) |  | 2.90 (2.51 to 3.30) | 2.45 (2.04 to 2.96) | 3.40 (2.78 to 4.14) |  | 84.09 (73.09 to 95.83) | 67.87 (56.82 to 81.71) | 101.74 (84.15 to 123.21) |
| Non-melanoma skin cancer | 35.66 (29.80 to 41.90) | 34.01 (28.19 to 40.22) | 37.69 (31.67 to 44.20) |  | 1.21 (1.03 to 1.39) | 1.03 (0.85 to 1.22) | 1.43 (1.15 to 1.73) |  | 20.67 (17.66 to 23.95) | 16.44 (13.54 to 19.82) | 25.53 (20.59 to 31.35) |
| Other malignant neoplasms | 9.13 (7.92 to 10.47) | 8.98 (7.53 to 10.70) | 9.36 (7.61 to 11.24) |  | 4.41 (3.78 to 5.08) | 3.95 (3.25 to 4.75) | 4.94 (3.97 to 6.00) |  | 144.34 (124.89 to 165.17) | 127.99 (106.92 to 152.16) | 162.16 (132.94 to 193.84) |
| Other pharynx cancer | 0.28 (0.24 to 0.33) | 0.14 (0.12 to 0.17) | 0.45 (0.36 to 0.55) |  | 0.24 (0.21 to 0.28) | 0.11 (0.09 to 0.13) | 0.40 (0.32 to 0.48) |  | 5.69 (4.75 to 6.68) | 2.59 (2.13 to 3.14) | 9.24 (7.30 to 11.34) |
| Ovarian cancer | 4.29 (3.43 to 5.28) | 8.12 (6.50 to 10.00) | - |  | 2.78 (2.24 to 3.42) | 5.21 (4.21 to 6.42) | - |  | 80.87 (64.94 to 100.12) | 153.16 (122.96 to 189.70) | - |
| Pancreatic cancer | 5.78 (4.97 to 6.64) | 5.63 (4.64 to 6.81) | 5.94 (4.79 to 7.28) |  | 6.01 (5.16 to 6.87) | 5.88 (4.88 to 7.07) | 6.13 (4.98 to 7.41) |  | 134.03 (114.51 to 154.11) | 126.05 (104.41 to 152.73) | 142.72 (114.70 to 174.43) |
| Prostate cancer | 24.09 (18.39 to 32.20) | - | 52.35 (40.04 to 70.09) |  | 8.78 (6.69 to 12.08) | - | 19.37 (14.77 to 26.70) |  | 146.22 (111.60 to 198.30) | - | 319.46 (244.06 to 432.48) |
| Stomach cancer | 9.70 (8.43 to 11.19) | 8.53 (7.10 to 10.27) | 11.05 (9.11 to 13.51) |  | 8.86 (7.64 to 10.16) | 7.64 (6.35 to 9.17) | 10.28 (8.45 to 12.41) |  | 202.96 (174.57 to 234.27) | 171.50 (141.27 to 209.00) | 238.68 (195.80 to 290.80) |
| Testicular cancer | 2.83 (1.58 to 4.11) | - | 5.76 (3.29 to 8.28) |  | 0.52 (0.41 to 0.69) | - | 1.08 (0.84 to 1.41) |  | 28.28 (21.97 to 40.15) | - | 57.78 (44.99 to 81.53) |
| Thyroid cancer | 2.85 (2.40 to 3.36) | 3.94 (3.20 to 4.81) | 1.62 (1.29 to 2.00) |  | 0.83 (0.71 to 0.95) | 1.04 (0.86 to 1.25) | 0.58 (0.46 to 0.71) |  | 19.95 (17.27 to 22.96) | 24.70 (20.41 to 29.71) | 14.47 (11.63 to 17.82) |
| Tracheal, bronchus, and lung cancer | 9.52 (8.23 to 10.97) | 6.41 (5.30 to 7.74) | 13.17 (10.84 to 16.05) |  | 9.74 (8.36 to 11.24) | 6.27 (5.11 to 7.62) | 13.83 (11.31 to 16.66) |  | 208.33 (178.38 to 240.60) | 137.40 (111.46 to 168.42) | 290.36 (238.45 to 353.10) |
| Uterine cancer | 2.86 (2.32 to 3.49) | 5.40 (4.37 to 6.58) | - |  | 0.79 (0.65 to 0.96) | 1.47 (1.22 to 1.79) | - |  | 20.94 (17.42 to 25.21) | 39.40 (32.76 to 47.46) | - |

95% UI: 95% Uncertainty intervals

# **Supplementary Table 2.** Total and sex-specific DALYs counts by group of cancer in Mexico during 2019.

| **Group of cancer** | **DALYs (counts, 95% UI)** | | |
| --- | --- | --- | --- |
| Total | Female | Male |
| Bladder cancer | 33,727 (28,734 to 39,187) | 11,514 (9,492 to 13,951) | 22,213 (17,957 to 26,786) |
| Brain and central nervous system cancer | 105,082 (77,467 to 123,371) | 44,817 (27,388 to 56,013) | 60,265 (43,090 to 73,556) |
| Breast cancer | 256,474 (212,636 to 312,818) | 254,489 (210,687 to 310,666) | 1,984 (1,614 to 2,427) |
| Cervical cancer | 188,921 (150,715 to 254,978) | 188,921 (150,715 to 254,978) | - |
| Colon and rectum cancer | 260,198 (223,549 to 299,468) | 116,190 (95,835 to 141,022) | 144,007 (118,470 to 175,276) |
| Esophageal cancer | 40,458 (33,947 to 47,718) | 9,943 (8,240 to 12,015) | 30,515 (24,308 to 37,441) |
| Gallbladder and biliary tract cancer | 66,207 (54,902 to 87,455) | 45,701 (36,001 to 66,583) | 20,506 (15,650 to 26,371) |
| Hodgkin lymphoma | 22,627 (18,616 to 29,984) | 8,779 (6,620 to 13,618) | 13,848 (10,933 to 18,423) |
| Kidney cancer | 94,015 (79,440 to 109,880) | 34,249 (28,451 to 41,181) | 59,766 (47,054 to 74,853) |
| Larynx cancer | 25,548 (21,280 to 30,742) | 3,712 (2,998 to 5,414) | 21,836 (17,648 to 26,691) |
| Leukemia | 238,812 (210,173 to 268,748) | 108,552 (90,825 to 127,478) | 130,260 (110,785 to 152,496) |
| Lip and oral cavity cancer | 27,215 (23,357 to 31,174) | 10,449 (8,652 to 12,690) | 16,766 (13,754 to 20,417) |
| Liver cancer | 97,973 (84,151 to 111,931) | 47,236 (38,980 to 56,666) | 50,737 (41,370 to 61,822) |
| Malignant skin melanoma | 23,555 (17,119 to 31,916) | 10,061 (6,173 to 13,182) | 13,494 (8,559 to 20,328) |
| Mesothelioma | 9,673 (8,050 to 11,453) | 3,270 (2,016 to 4,191) | 6,404 (5,182 to 7,828) |
| Multiple myeloma | 37,591 (28,921 to 44,774) | 17,094 (13,244 to 21,159) | 20,497 (14,116 to 26,547) |
| Nasopharynx cancer | 5,187 (4,345 to 6,106) | 1,419 (1,165 to 1,724) | 3,768 (2,973 to 4,645) |
| Non-Hodgkin lymphoma | 103,484 (89,676 to 117,992) | 43,635 (36,416 to 52,652) | 59,850 (49,346 to 72,551) |
| Non-melanoma skin cancer | 23,861 (20,384 to 27,653) | 10,102 (8,292 to 12,208) | 13,759 (11,033 to 16,964) |
| Other malignant neoplasms | 176,853 (152,499 to 203,048) | 81,080 (67,139 to 97,028) | 95,773 (78,699 to 114,575) |
| Other pharynx cancer | 6,875 (5,741 to 8,093) | 1,670 (1,367 to 2,025) | 5,205 (4,097 to 6,407) |
| Ovarian cancer | 101,537 (81,437 to 126,005) | 101,537 (81,437 to 126,005) | - |
| Pancreatic cancer | 160,422 (136,832 to 184,529) | 79,929 (66,038 to 97,053) | 80,493 (64,599 to 98,444) |
| Prostate cancer | 161,553 (122,756 to 219,506) | - | 161,553 (122,756 to 219,506) |
| Stomach cancer | 245,427 (211,082 to 283,298) | 110,159 (90,482 to 134,634) | 135,268 (110,797 to 164,906) |
| Testicular cancer | 36,622 (28,537 to 49,875) | - | 36,622 (28,537 to 49,875) |
| Thyroid cancer | 23,996 (20,734 to 27,662) | 15,753 (12,983 to 18,978) | 8,243 (6,601 to 10,145) |
| Tracheal, bronchus, and lung cancer | 246,546 (211,125 to 284,787) | 87,439 (70,833 to 107,402) | 159,107 (130,552 to 194,130) |
| Uterine cancer | 25,613 (21,231 to 30,887) | 25,613 (21,231 to 30,887) | - |

95% UI: 95% Uncertainty intervals

# **Supplementary Table 3.** Percentage of change from 1990 to 2019 of the crude incidence, deaths, and DALYs due to 29 malignant neoplasms in Mexico.

| **Group of cancer** | **Incidence (% of change 1990-2019, 95% UI)** | **Deaths (% of change 1990-2019, 95% UI)** | **DALYs (% of change 1990-2019, 95% UI)** |
| --- | --- | --- | --- |
| Bladder cancer | 246 (195 to 308) | 174 (135 to 218) | 161 (123 to 205) |
| Brain and central nervous system cancer | 129 (49 to 181) | 134 (54 to 189) | 76 (13 to 116) |
| Breast cancer | 317 (238 to 411) | 185 (135 to 246) | 167 (121 to 225) |
| Cervical cancer | 27 (-1 to 97) | 10 (-13 to 77) | 4 (-18 to 61) |
| Colon and rectum cancer | 421 (348 to 498) | 304 (251 to 365) | 289 (237 to 350) |
| Esophageal cancer | 112 (80 to 149) | 107 (75 to 144) | 103 (70 to 141) |
| Gallbladder and biliary tract cancer | 61 (31 to 142) | 57 (28 to 134) | 49 (20 to 122) |
| Hodgkin lymphoma | 70 (44 to 107) | 19 (0 to 41) | -7 (-23 to 13) |
| Kidney cancer | 291 (233 to 356) | 256 (197 to 316) | 183 (136 to 333) |
| Larynx cancer | 75 (45 to 110) | 48 (22 to 76) | 40 (15 to 69) |
| Leukemia | 34 (17 to 53) | 59 (37 to 81) | 20 (4 to 38) |
| Lip and oral cavity cancer | 170 (134 to 210) | 142 (110 to 178) | 128 (96 to 163) |
| Liver cancer | 310 (254 to 371) | 314 (257 to 376) | 251 (200 to 307) |
| Malignant skin melanoma | 436 (264 to 541) | 283 (147 to 361) | 230 (118 to 300) |
| Mesothelioma | 210 (158 to 267) | 227 (173 to 291) | 189 (137 to 245) |
| Multiple myeloma | 306 (239 to 374) | 270 (205 to 336) | 251 (188 to 316) |
| Nasopharynx cancer | 137 (101 to 180) | 109 (75 to 147) | 84 (54 to 117) |
| Non-Hodgkin lymphoma | 239 (191 to 289) | 170 (133 to 210) | 92 (65 to 223) |
| Non-melanoma skin cancer | 175 (168 to 181) | 162 (127 to 200) | 109 (79 to 244) |
| Other malignant neoplasms | 175 (135 to 216) | 113 (80 to 147) | 58 (35 to 184) |
| Other pharynx cancer | 140 (102 to 183) | 110 (77 to 147) | 98 (65 to 135) |
| Ovarian cancer | 236 (165 to 316) | 232 (164 to 304) | 205 (141 to 374) |
| Pancreatic cancer | 199 (158 to 242) | 196 (155 to 240) | 183 (141 to 226) |
| Prostate cancer | 385 (291 to 506) | 192 (141 to 255) | 189 (139 to 251) |
| Stomach cancer | 100 (74 to 129) | 77 (55 to 105) | 76 (53 to 106) |
| Testicular cancer | 312 (170 to 493) | 132 (69 to 189) | 122 (49 to 180) |
| Thyroid cancer | 338 (268 to 415) | 196 (154 to 240) | 177 (137 to 218) |
| Tracheal, bronchus, and lung cancer | 86 (61 to 114) | 82 (57 to 109) | 68 (43 to 194) |
| Uterine cancer | 377 (284 to 483) | 169 (122 to 226) | 185 (136 to 244) |

95% UI: 95% Uncertainty intervals

# **Supplementary Table 4.** Percentage of change from 1990 to 2019 of the age-standardized rate of incidence, deaths, and DALYs (per 100,000 people) due to 29 malignant neoplasms in Mexico.

| **Group of cancer** | **Incidence (% of change 1990-2019, 95% UI)** | **Deaths (% of change 1990-2019, 95% UI)** | **DALYs (% of change 1990-2019, 95% UI)** |
| --- | --- | --- | --- |
| Bladder cancer | 22.06 (4.41 to 43.68) | -7.64 (-20.23 to 7.13) | -5.36 (-18.72 to 10.34) |
| Brain and central nervous system cancer | 26.00 (-19. to 55.08) | -17.4 (-24.02 to 45.4) | 9.35 (-30.42 to 34.03) |
| Breast cancer | 65.80 (34.4 to 102.9) | -9.27 (-9.54 to 32.0) | 10.23 (-8.50 to 33.72) |
| Cervical cancer | -47.9 (-59. to -17.3) | -58.2 (-67.02 to -30.7) | -57.20 (-66.36 to -32.63) |
| Colon and rectum cancer | 89.22 (63.0 to 116.7) | -41.7 (-23.61 to 62.3) | 51.33 (-31.40 to 74.77) |
| Esophageal cancer | -24.9 (-36. to -12.1) | -28.2 (-39.18 to -15.6) | -24.66 (-36.71 to -10.62) |
| Gallbladder and biliary tract cancer | -42.6 (-53. to -13.6) | -44.9 (-55.07 to -18.1) | -45.10 (-55.45 to -17.77) |
| Hodgkin lymphoma | -9.78 (-23. to 9.287) | -43.3 (-52.26 to -33.1) | -46.15 (-54.99 to -34.78) |
| Kidney cancer | 72.40 (47.2 to 100.0) | -38.8 (-16.60 to 61.9) | 32.54 (-11.83 to 54.60) |
| Larynx cancer | -37.6 (-48. to -25.2) | -48.1 (-56.92 to -38.5) | -48.25 (-57.27 to -37.71) |
| Leukemia | -6.29 (-17. to 6.600) | -4.89 (-17.32 to 8.29) | -11.40 (-22.99 to 1.04) |
| Lip and oral cavity cancer | 0.431 (-12. to 14.84) | -14.1 (-25.30 to -1.94) | -11.67 (-23.78 to 1.88) |
| Liver cancer | 54.60 (33.4 to 77.15) | -52.0 (-31.53 to 74.3) | 47.65 (-27.04 to 69.84) |
| Malignant skin melanoma | 116.8 (48.8 to 157.9) | -44.2 (-6.55 to 73.2) | 43.43 (-5.59 to 72.37) |
| Mesothelioma | 20.07 (0.45 to 41.67) | -24.2 (-3.96 to 48.2) | 17.88 (-1.84 to 41.03) |
| Multiple myeloma | 48.76 (23.1 to 74.08) | -34.3 (-9.56 to 58.3) | 32.99 (-9.26 to 57.22) |
| Nasopharynx cancer | -3.63 (-18. to 13.57) | -18.5 (-31.87 to -4.21) | -17.81 (-31.09 to -2.90) |
| Non-Hodgkin lymphoma | 69.23 (47.1 to 93.10) | -20.9 (-5.03 to 38.0) | 7.63 (-6.83 to 23.38) |
| Non-melanoma skin cancer | 1.194 (-0.0 to 2.446) | -9.73 (-20.82 to 2.86) | -18.96 (-30.09 to -6.03) |
| Other malignant neoplasms | 47.69 (26.3 to 69.39) | -0.97 (-16.52 to 14.5) | -4.14 (-18.07 to 10.47) |
| Other pharynx cancer | -12.8 (-26. to 2.243) | -25.0 (-36.66 to -12.3) | -24.91 (-37.34 to -10.93) |
| Ovarian cancer | 43.68 (13.1 to 77.44) | -27.3 (-1.47 to 55.1) | 29.33 (-1.92 to 58.39) |
| Pancreatic cancer | 7.057 (-7.6 to 22.42) | -4.63 (-9.69 to 19.9) | 5.28 (-10.03 to 21.42) |
| Prostate cancer | 63.61 (32.7 to 103.5) | -6.27 (-22.35 to 12.8) | -1.33 (-18.26 to 19.06) |
| Stomach cancer | -29.1 (-38. to -19.0) | -38.7 (-46.25 to -29.4) | -33.51 (-42.35 to -22.44) |
| Testicular cancer | 190.6 (91.6 to 266.2) | -34.0 (-4.59 to 62.4) | 47.90 (-11.01 to 79.83) |
| Thyroid cancer | 77.29 (49.6 to 107.6) | -6.86 (-7.70 to 22.2) | 10.15 (-5.08 to 26.49) |
| Tracheal, bronchus, and lung cancer | -32.8 (-41. to -22.9) | -35.5 (-44.36 to -26.2) | -36.94 (-45.93 to -27.36) |
| Uterine cancer | 75.48 (41.5 to 114.1) | -5.86 (-21.80 to 13.6) | 5.99 (-11.91 to 27.73) |

95% UI: 95% Uncertainty intervals
